# Supplementary material for: Association between hospitalisation for ambulatory care-sensitive conditions and primary health care physician specialisation: a cross-sectional ecological study in Curitiba (Brazil)
Source: PubMed Central journal article supplement — BMJ Open. 2017 Dec 4;7(12):e015322. doi: 10.1136/bmjopen-2016-015322 (PMC5719282; doi:10.1136/bmjopen-2016-015322), 2017-12-04
Supplement: bmjopen-2016-015322.draft_revisions.pdf [file bmjopen-2016-015322.draft_revisions.pdf]

# BMJ Open

## Can specializing in Family Medicine reduce Hospitalization for Ambulatory Care Sensitive Conditions? Evidence from a cross-sectional ecological study.

|                                 |                                                                                                                                                                                                                                                                                                                                                                                  |
|---------------------------------|----------------------------------------------------------------------------------------------------------------------------------------------------------------------------------------------------------------------------------------------------------------------------------------------------------------------------------------------------------------------------------|
| Journal:                        | <i>BMJ Open</i>                                                                                                                                                                                                                                                                                                                                                                  |
| Manuscript ID                   | bmjopen-2016-015322                                                                                                                                                                                                                                                                                                                                                              |
| Article Type:                   | Research                                                                                                                                                                                                                                                                                                                                                                         |
| Date Submitted by the Author:   | 26-Nov-2016                                                                                                                                                                                                                                                                                                                                                                      |
| Complete List of Authors:       | Afonso, Marcelo; Universidade de Brasilia, Dept. Saúde Coletiva<br>Shimizu, Helena; Universidade de Brasilia, Dept. Saúde Coletiva<br>Merchan-Hamann, Edgar; Universidade de Brasilia, Dept. Saúde Coletiva<br>Ramalho, Walter; Universidade de Brasilia, Dept. Saúde Coletiva<br>Afonso, Tarcisio; Fundacao Cultural Dr Pedro Leopoldo, Professional<br>Master's Degree Program |
| <b>Primary Subject Heading</b>: | Public health                                                                                                                                                                                                                                                                                                                                                                    |
| Secondary Subject Heading:      | General practice / Family practice, Epidemiology, Health services research                                                                                                                                                                                                                                                                                                       |
| Keywords:                       | PRIMARY CARE, PUBLIC HEALTH, EPIDEMIOLOGY                                                                                                                                                                                                                                                                                                                                        |
|                                 |                                                                                                                                                                                                                                                                                                                                                                                  |

SCHOLARONE™  
Manuscripts

1  
2  
3 **Can specializing in Family Medicine reduce Hospitalization for Ambulatory Care Sensitive**  
4 **Conditions? Evidence from a cross-sectional ecological study.**  
5

6 AFONSO, MPD; SHIMIZU, HE; MERCHAN-HAMANN, E; RAMALHO, WM; AFONSO, T

7  
8  
9 *Descriptors: PRIMARY HEALTH CARE, GENERAL PRACTICE, PUBLIC HEALTH, OUTCOME*  
10 *RESEARCH EVALUATION.*  
11

12  
13 **ABSTRACT: Introduction:** Hospitalization for ambulatory care sensitive conditions (HACSCs) is  
14 frequently used as an indicator of the quality and effectiveness of primary health care (PHC)  
15 services around the world. The aim of the present study was to evaluate whether the PHC  
16 model (Family Health Strategy-FHS- x conventional) and the availability of specialized PHC  
17 physicians is associated or not with total hospitalization or HASSCs in the National Health  
18 System (SUS) of the municipality of Curitiba, Paraná state (PR). **Methodology:** this is a cross-  
19 sectional ecological study using multiple linear regression with socioeconomic and professional  
20 data from Municipal Health Units (MHU) between April 1, 2014 and March 31, 2015. **Results:**  
21 after adjustment for age and sex and control of socioeconomic variables, the FHS model was  
22 associated with six fewer HACSCs a year per 10,000 inhabitants in relation to the conventional  
23 model and the availability of one family physician (FP) at an FHS model MHU per 10,000  
24 inhabitants was associated with 1.1 fewer HACSCs for heart failure (HF) a year per 10,000  
25 inhabitants; both results were statistically significant at 5%. Basic specialists (clinicians,  
26 pediatricians and obstetrician/gynecologists) and subspecialists showed no significant  
27 association with HACSC rates. **Conclusion:** these results obtained in a major Brazilian city  
28 reinforce the role of FHS as a priority PHC model in the country and indicate the potentially  
29 significant impact of specializing in family medicine on improving the health conditions of the  
30 population.  
31

32  
33  
34  
35  
36  
37  
38  
39  
40  
41  
42 **STRENGTHS AND LIMITATIONS OF THIS STUDY:** All public PHC services in a major Brazilian city  
43 were included in this study and its results were adjusted for the most important  
44 socioeconomic variables, whose influence is well recognized in hospitalizations. However, the  
45 short period of PHC physicians' presence in MHUs considered (12 months), the small number  
46 of MHUs studied and the impossibility of controlling the results for other potential  
47 confounding variables justify caution in the interpretation of these results, which should be  
48 confirmed by new studies.  
49  
50  
51  
52  
53  
54  
55  
56  
57  
58  
59  
60

**What is already known on this subject?**

- Effective and quality primary health care (PHC) is related to fewer Hospitalizations for Ambulatory Care Sensitive Conditions (HACSCs) worldwide.
- In Brazil, the family health strategy (FHS), a priority PHC organization strategy in the country, has also been associated with fewer HACSCs.
- There was a significant association between specializing in family medicine and the strength of PHC attributes among FHS doctors in Brazil.

**How does this study contribute?**

- Specializing in family medicine in PHC was significantly associated with lower HACSC rates, especially due to heart failure.
- No other PHC medical specialties were significantly associated with HACSC rates.

**INTRODUCTION:**

Primary health care (PHC) is the first-contact level and the backbone of rational National Health Systems, responsible for providing accessible, continuous, comprehensive and coordinated health care to the population.(1) An important indicator of the quality and effectiveness of this care is the rate of hospitalizations for ambulatory care sensitive conditions (ACSC).(2-5) ACSCs are conditions that can be controlled through the provision of timely and qualified PHC services to avoid hospitalization by 1) preventing the onset of disease, 2) adequately controlling acute illness or 3) effectively managing chronic conditions.(6) Brazil has had a National ACSC List since 2008.(7,8)

In Brazil, the preferred PHC organization model within the National Health System (SUS) is the Family Health Strategy (FHS).(9) FHS teams consist of a general practitioner, a professional nurse, one or two assistant nurses and 4 to 12 community health agents, caring for 3000 people on average.(9) Nevertheless, the so-called conventional model, based on ambulatory care in the basic specialties of Pediatrics, Internal Medicine and Gynecology and Obstetrics persists, particularly in large cities.(10,11) PHC physicians are not legally required to have a specialty. Physicians become specialists in Family Medicine in Brazil after completing two-year Medical Residency program or through a certification examination after 4 years' experience in the field.

Several studies have demonstrated an association between FHS coverage and a decline in HACSCs.(12-15) Between 1999 and 2007, chronic HACSC rates in municipalities with greater FHS coverage were 13% lower in relation to those with less coverage, reaching 23% for hospitalization due to asthma.(16)

1  
2  
3 A recent study found a significant association between specializing in family medicine  
4 and the strength of PHC attributes in the FHS of an important Brazilian capital, measured using  
5 the PCA-tool.(17) Thus, it can be speculated that specific medical training for PHC in Brazil is  
6 related to both major and intermediate health outcomes. If lower HACSC rates are expected  
7 with access to qualified clinical care, medical specialties aimed at training PHC professionals  
8 should, in theory, influence this outcome. However, studies that assess the relationship  
9 between the specialties of PHC physicians and health outcomes remain scarce.  
10

11  
12  
13  
14  
15 The aim of the present study was to evaluate whether the PHC model and the  
16 availability of specialized PHC physicians are associated or not with total hospitalization or  
17 HASC rates in the National Health System (SUS) of the municipality of Curitiba, Paraná state  
18 (PR).  
19  
20  
21

#### 22 23 24 **METHODOLOGY:**

25 This is a cross-sectional ecological study conducted in the municipality of Curitiba (PR).  
26 The municipality exhibits high PHC coverage, particularly in terms of FHS, which reached 52%  
27 of the population in April 2014.(18) Moreover, a high number of family physicians is reported  
28 in comparison to other Brazilian capitals, and health care services have been computerized for  
29 over a decade.(10) The units of analysis were Municipal Health Units (MHU), classified as a  
30 Family Health Strategy (FHS) or Conventional (EAB) in accordance with the PHC model of their  
31 teams.  
32  
33  
34  
35  
36  
37  
38  
39

#### 40 **Data:**

41 Socioeconomic data by census tract were obtained from 2010 Census databases,  
42 provided by the Brazilian Institute of Geography and Statistics (IBGE).  
43  
44

45 Information on hospital admissions was obtained from the Hospital Information  
46 System (SIH), through registered Hospitalization Authorization Forms (AIH). Inclusion criteria  
47 were single or initial AIH, valid until June 2015, for Curitiba (PR) residents hospitalized in the  
48 municipality between April 1, 2014 and March 31, 2015. Hospital admissions for childbirth  
49 (International Classification of Diseases, 10<sup>th</sup> edition - ICD-10 - O.80 to O.84) were excluded as  
50 physiological events.(7)  
51  
52  
53  
54  
55  
56  
57  
58  
59  
60

1  
2  
3 AIH information and socioeconomic data were aggregated at the level of the Municipal  
4 Health Unit (MHU) coverage areas, using QuantumGIS software, version 2.10 Pisa. Addresses  
5 on AIH were geocoded using the MMQGIS plugin and GoogleMaps server.  
6  
7

8 Quantitative data and information on the specialties of PHC physicians in Curitiba (PR)  
9 during the study period were obtained from databases of the Curitiba Municipal Health  
10 Department (SMS-Curitiba), Regional Board of Medicine for the State of Paraná, Brazilian  
11 Medical Association (AMB), and the National Medical Residency Committee (CNRM).  
12  
13

14 The MHU model and doctors' working hours were used as predictor variables. Doctors  
15 were classified as 1) Family Physicians (FP); 2) Basic Specialty Physicians (BSP); or 3)  
16 Subspecialty Physicians (SUBP) if they had concluded their medical residency through the  
17 CNRM or been awarded a degree by a scientific association recognized by the AMB prior to  
18 May 31, 2015, in the fields of 1) Family Medicine (FM); 2) Internal Medicine, Pediatrics or  
19 Gynecology and Obstetrics; and 3) other Medical Specialties, respectively.  
20  
21

22 The average supply of doctors was calculated using the mean total working hours of  
23 physicians in each MHU during the study period. For physicians who remained at the same  
24 MHU for the 12-month study period, total effective working hours were added to working  
25 hours per category for each MHU, according to the classification above. For each amount, the  
26 ratio of working hours to the total population residing in the MHU coverage area (2010  
27 Census) was calculated. In order to facilitate understanding, variables were presented as  
28 "number equivalent to physicians with a 40-hour work week per 10,000 inhabitants"  
29 ("Equivalents").  
30  
31

32 As outcome variables for each MHU, total hospitalization rates were calculated, as well  
33 as HACSC and the main ACSC per age group, namely bacterial pneumonia (BP), angina and  
34 heart failure (HF). Hospitalization rates were standardized for age and sex via the direct  
35 method, using the structure of the population of Curitiba (PR) according to the 2010 Census as  
36 reference. In order to calculate hospitalization rates, the population in the respective MHU  
37 coverage areas was used as a denominator, in accordance with the 2010 Census.  
38 Hospitalizations for ACSC (HACSC) were defined as those for which the "Main Diagnosis" field  
39 of the AIH contained a disease classified by an ICD-10 code as belonging to the Brazilian List of  
40 Ambulatory Care Sensitive Conditions.<sup>(8)</sup> Due to its high incidence rate, records for which the  
41 main diagnosis was ICD-10 J18.9 (Pneumonia; unspecified organism) were included in this  
42 study as BP.  
43  
44  
45  
46  
47  
48  
49  
50  
51  
52  
53  
54  
55  
56  
57  
58  
59  
60

1  
2  
3 Four socioeconomic variables per MHU were adopted as context: 1) literacy rate in the  
4 population aged 10 years or older (Lit.Rt); 2) percentage of blacks, mulattos and native  
5 Brazilians (Pop.Perc); 3) Per capita income (Income); and 4) percentage of households with a  
6 per capita income below half the minimum wage (Perc.House).  
7  
8  
9

### 10 11 12 **Data analysis:**

13  
14 SPSS Statistics software version 18 (PASW Statistics 18) was used for data analysis.  
15 Calculation of the variance inflation factor (VIF) identified high collinearity (VIF>5) between the  
16 socioeconomic variables Lit.Rt, Pop.Perc and Perc.House, preventing their concomitant use in  
17 the analysis, but not between variables related to physician working hours. Working hours per  
18 medical category were similar between EAB and FHS model MHUs, except for FP, whose  
19 working hours were 15 times higher at FHS model MHUs than conventional (EAB) units.  
20  
21

22 In order to estimate the effects of predictor variables independently of socioeconomic  
23 variables, hierarchical linear regression with stepwise-backward elimination was carried out  
24 for each dependent variable studied, with an F-to-enter statistic of 0.10 and F-to-remove of  
25 0.20, initially for all the MHUs and subsequently for FHS model MHUs. The variable related to  
26 the FP category was only used in the latter given its significant association with this model.  
27  
28

29 Two models were constructed. Model 1 included the variable "Income" and, among  
30 the socioeconomic variables exhibiting high collinearity, the variable with the greatest Beta  
31 value in simple regression for the dependent variable under study. Variables with a p-value  
32 lower than 0.20 were maintained and fixed for model 2, which included the other variables  
33 under study. The results were presented as non-standardized coefficients and considered  
34 significant at 5%. Results significant at 10% were identified for HACSCs.  
35  
36  
37  
38  
39  
40  
41  
42  
43  
44  
45

### 46 **RESULTS:**

47 The study included 109 MHUs, 44 (40.4%) of which were conventional (EAB) and 65  
48 (59.6%) applied the FHS model. Of the FHS model MHUs, one (0.9%) was created during the  
49 study period. In April 2015, SMS-Curitiba had 512 PHC physicians, 433 of which remained at  
50 the same MHU throughout the 12-month study period. Seventy-seven (17.8%) were classified  
51 as FP; 117 (27.0%) as BSP; 37 (8.5%) as SUBP, and 202 (46.7%) had no specialty recognized by  
52 the CNRM or AMB.  
53  
54  
55  
56  
57  
58  
59  
60

1  
2  
3 Figure 1 shows the selection of AIH for analysis according to inclusion and exclusion  
4 criteria. The mean values of each variable studied are shown in Table 1, accompanied by  
5 standard deviation.  
6  
7

8 The coverage areas of FHS model MHUs exhibited worse socioeconomic conditions  
9 compared to EAB units. Among FHS model MHUs, a negative association was observed  
10 between Equivalent FP and the variables Lit.Rt and Income. The same was true for the  
11 variables Total Equivalent and SUBP Equivalent, while the opposite was observed for the group  
12 BSP Equivalent.  
13  
14  
15  
16  
17  
18  
19  
20  
21  
22  
23  
24  
25  
26  
27  
28  
29  
30  
31  
32  
33  
34  
35  
36  
37  
38  
39  
40  
41  
42  
43  
44  
45  
46  
47  
48  
49  
50  
51  
52  
53  
54  
55  
56  
57  
58  
59  
60

Figure 1. Selection of AIH for analysis according to inclusion and exclusion criteria.

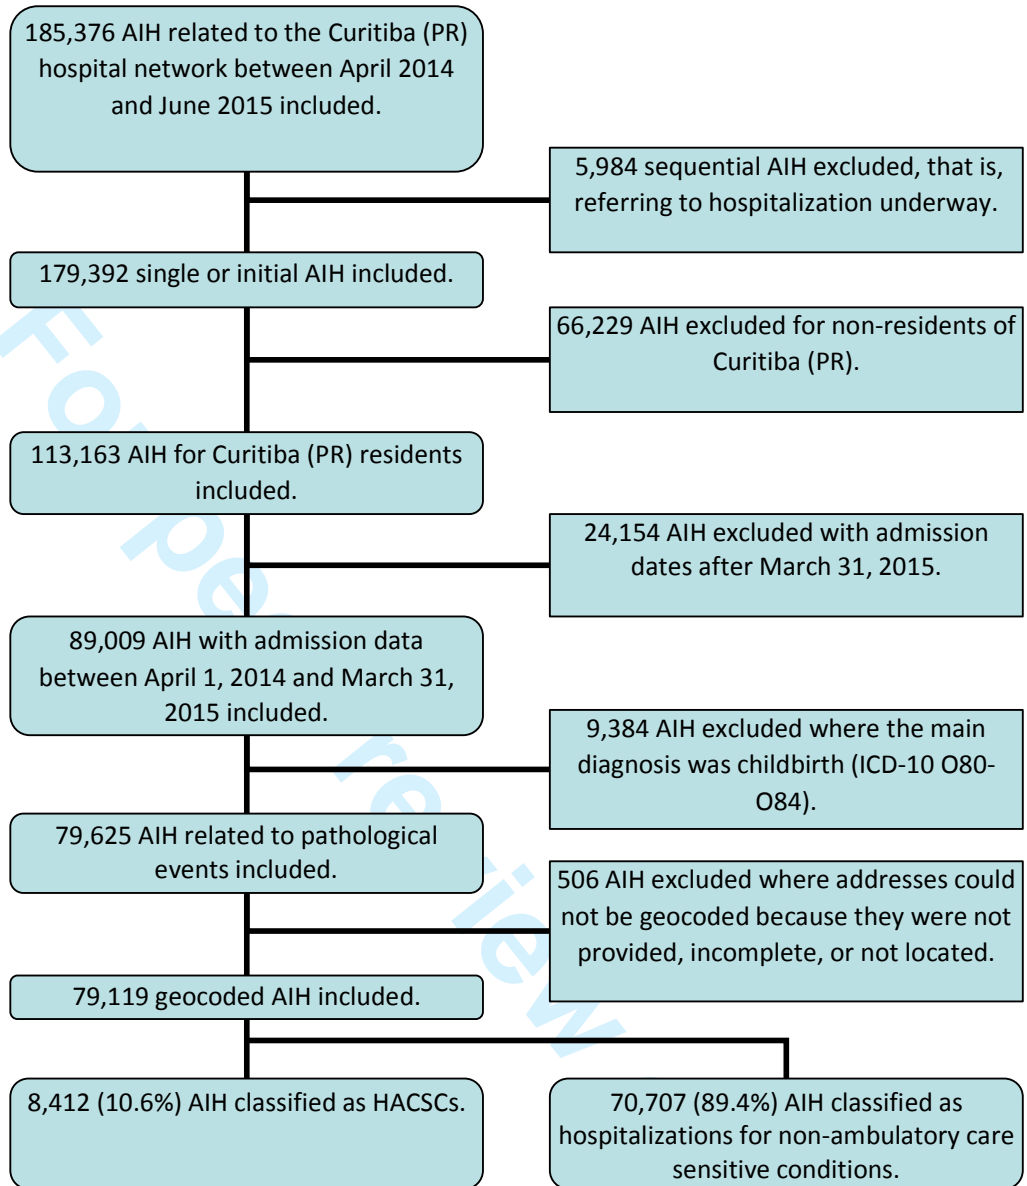



Table 1. Means and standard deviations for socioeconomic variables, hospitalization rates, and 40-hour week Physician equivalents according to MHU models. Curitiba, Brazil.

| Study variables                                                                       | EAB (n=44 MHUs) |                    | FHS (n=65 MHUs) |                    | Total (n=109 MHUs) |                    |
|---------------------------------------------------------------------------------------|-----------------|--------------------|-----------------|--------------------|--------------------|--------------------|
|                                                                                       | Mean            | Standard deviation | Mean            | Standard deviation | Mean               | Standard deviation |
| <b>Socioeconomic variables</b>                                                        |                 |                    |                 |                    |                    |                    |
| Literacy rate in the population aged 10 years or older (%) – Lit.Rt                   | 98.4            | 0.7                | 96.8            | 1.4                | 97.4               | 1.4                |
| Percentage of blacks, mulattos and native Brazilians (%) – Pop. Perc                  | 16.8            | 5.4                | 27.6            | 8.2                | 23.2               | 8.9                |
| Per capita income (R\$) – Income                                                      | 1,232.57        | 493.16             | 777.17          | 429.07             | 961.00             | 506.28             |
| Percentage of households with a per capita income below minimum wage (%) – Perc.House | 6.0             | 2.6                | 12.6            | 5.8                | 10.0               | 5.8                |
| <b>Hospitalization rates per year per 10,000 inhabitants</b>                          |                 |                    |                 |                    |                    |                    |
| Total                                                                                 | 418.7           | 127.9              | 499.4           | 154.0              | 466.8              | 148.9              |
| ACSC                                                                                  | 46.0            | 13.7               | 47.7            | 14.2               | 47.0               | 14.0               |
| Bacterial Pneumonia - BP                                                              | 11.8            | 5.9                | 12.9            | 6.2                | 12.5               | 6.1                |
| Angina                                                                                | 8.2             | 3.2                | 8.3             | 4.2                | 8.3                | 3.9                |
| Heart Failure - HF                                                                    | 8.0             | 2.9                | 7.7             | 3.2                | 7.8                | 3.1                |
| <b>40-hour week Physician equivalents per 10,000 inhabitants.</b>                     |                 |                    |                 |                    |                    |                    |
| Average supply                                                                        | 2.10            | 0.76               | 3.51            | 1.50               | 2.94               | 1.43               |
| Family Physician - FP                                                                 | 0.06            | 0.12               | 0.89            | 1.10               | 0.55               | 0.95               |
| Basic specialists (Clinicians, Pediatrics and Gynecologists) - BSP                    | 0.75            | 0.47               | 0.21            | 0.40               | 0.43               | 0.50               |
| Subspecialty Physicians - SUBP                                                        | 0.17            | 0.20               | 0.19            | 0.50               | 0.18               | 0.40               |
| Physicians at the same MHU for 12 months - Total                                      | 1.77            | 0.73               | 2.58            | 1.28               | 2.25               | 1.16               |

1  
2  
3 The results of hierarchical linear regression coefficients in models 1 and 2 are  
4 presented in Tables 2 and 3, respectively. Values statistically significant at 5% are identified in  
5 the tables. For ACSCs, results statistically significant at 10% are also marked.  
6  
7

8 Socioeconomic variables were alternately significant for all the dependent variables  
9 when all the MHUs were analyzed, except for HACSC for angina, indicating that the better the  
10 socioeconomic conditions, the lower the hospitalization rates. In analysis of FHS model MHUs,  
11 only the association between the Lit.Rt and hospitalization rates for BP was statistically  
12 significant at 5%.  
13  
14  
15  
16

17 The FHS model was associated with fewer HACSCs (on average 6.0 fewer  
18 hospitalizations a year per 10,000 inhabitants in relation to the EAB model), statistically  
19 significant at 5%. A statistically significant association was also observed between the  
20 availability of FP and fewer HACSCs for HF in FHS model MHUs (1.1 fewer hospitalizations a  
21 year per 10,000 inhabitants for every 40-hour week FP per 10,000 inhabitants). The variable  
22 Total equivalent was significantly correlated with higher HACSC rates in all the MHUs, as well  
23 as higher total hospitalization rates and admissions due to ACSCs in FHS model MHUs. The  
24 variables Average Supply Equivalent, BSP Equivalent and SUBP Equivalent were not  
25 significantly associated with any of the outcomes studied.  
26  
27  
28  
29  
30  
31  
32  
33  
34  
35  
36  
37  
38  
39  
40  
41  
42  
43  
44  
45  
46  
47  
48  
49  
50  
51  
52  
53  
54  
55  
56  
57  
58  
59  
60

Table 2. Results of hospitalization coefficients and p-values for model 1 of the socioeconomic variable for all MHUs and FHU model units. Curitiba, Brazil.

| Socioeconomic variables                                                               | Total                    |                  | ACSC                    |                  | Heart Failure - HF      |              | Angina  |         | Bacterial Pneumonia - BP |                  |
|---------------------------------------------------------------------------------------|--------------------------|------------------|-------------------------|------------------|-------------------------|--------------|---------|---------|--------------------------|------------------|
|                                                                                       | Coeff.                   | p value          | Coef f.                 | p value          | Coeff.                  | p value      | Coef f. | p value | Coef f.                  | p value          |
| Total (n=109 MHUs)                                                                    |                          |                  |                         |                  |                         |              |         |         |                          |                  |
| Literacy rate in the population aged 10 years or older (%) – Lit.Rt                   | <b>-55.0<sup>a</sup></b> | <b>&lt;0.001</b> | *                       | *                | -0.1                    | 0.861        | -0.1    | 0.801   | <b>-1.7<sup>a</sup></b>  | <b>&lt;0.001</b> |
| Per capita income (R\$ 100.00) – Income                                               | -5.2 <sup>b</sup>        | 0.129            | <b>-1.2<sup>a</sup></b> | <b>&lt;0.001</b> | <b>-0.2<sup>a</sup></b> | <b>0.007</b> | -0.1    | 0.347   | -0.1                     | 0.382            |
| Percentage of households with a per capita income below minimum wage (%) – Perc.House | *                        | *                | *                       | *                | *                       | *            | *       | *       | *                        | *                |
| Percentage of blacks, mulattos and native Brazilians (%) – Pop. Perc                  | *                        | *                | 0.2                     | 0.504            | *                       | *            | *       | *       | *                        | *                |
| FHS model MHUs (n=64)                                                                 |                          |                  |                         |                  |                         |              |         |         |                          |                  |
| Literacy rate in the population aged 10 years or older (%) – Lit.Rt                   | <b>-42.5<sup>a</sup></b> | <b>0.001</b>     | <b>-3.4<sup>a</sup></b> | <b>0.006</b>     | -0.5 <sup>b</sup>       | 0.059        | *       | *       | <b>-1.7<sup>a</sup></b>  | <b>0.002</b>     |
| Per capita income (R\$ 100.00) – Income                                               | 2.2                      | 0.688            | -0.4                    | 0.440            | -0.1                    | 0.784        | -0.1    | 0.804   | 0.1                      | 0.535            |
| Percentage of households with a per capita income below minimum wage (%) – Perc.House | *                        | *                | *                       | *                | *                       | *            | -0.1    | 0.480   | *                        | *                |
| Percentage of blacks, mulattos and native Brazilians (%) – Pop. Perc                  | *                        | *                | *                       | *                | *                       | *            | *       | *       | *                        | *                |

<sup>a</sup> Value p<0.05. <sup>b</sup> Value p<0.20.

Table 3. Results of hospitalization coefficients and p-values for model 2 of the socioeconomic variables, 40-hour week Physician equivalents and PHC model for all MHUs and FHU model units. Curitiba, Brazil.

| Variables                                                                             | Total                   |              | ACSC                    |              | Heart Failure - HF      |              | Angina |         | Bacterial Pneumonia - BP |              |
|---------------------------------------------------------------------------------------|-------------------------|--------------|-------------------------|--------------|-------------------------|--------------|--------|---------|--------------------------|--------------|
|                                                                                       | Coeff.                  | p value      | Coeff.                  | p value      | Coeff.                  | p value      | Coeff. | p value | Coeff.                   | p value      |
| Total (n=109 MHUs)                                                                    |                         |              |                         |              |                         |              |        |         |                          |              |
| <b>Socioeconomic variables</b>                                                        |                         |              |                         |              |                         |              |        |         |                          |              |
| Literacy rate in the population aged 10 years or older (%) – Lit.Rt                   | -32.5 <sup>a</sup>      | 0.015        | *                       | *            | *                       | *            | *      | *       | -2.1 <sup>a</sup>        | 0.000        |
| Per capita income (R\$ 100.00) – Income                                               | -4.9                    | 0.151        | -1.2 <sup>a</sup>       | 0.000        | -0.2 <sup>a</sup>       | 0.001        | *      | *       | *                        | *            |
| Percentage of households with a per capita income below minimum wage (%) – Perc.House | *                       | *            | *                       | *            | *                       | *            | *      | *       | *                        | *            |
| Percentage of blacks, mulattos and native Brazilians (%) – Pop. Perc                  | *                       | *            | *                       | *            | *                       | *            | *      | *       | *                        | *            |
| <b>40-hour week Physician equivalents per 10,000 inhabitants.</b>                     |                         |              |                         |              |                         |              |        |         |                          |              |
| Average supply                                                                        | -25.8                   | 0.187        | -2.0                    | 0.260        | -0.5                    | 0.226        | -0.6   | 0.224   | -0.8                     | 0.367        |
| Basic specialists (Clinicians, Pediatrics and Gynecologists) - BSP                    | -7.5                    | 0.811        | -2.7                    | 0.361        | 0.1                     | 0.920        | -0.7   | 0.427   | -1.3                     | 0.334        |
| Subspecialty Physicians - SUBP                                                        | 14.2                    | 0.644        | 2,2                     | 0.465        | -0.1                    | 0.908        | -0.4   | 0.673   | -0.5                     | 0.697        |
| Physicians at the same MHU for 12 months - Total                                      | <u>22.1<sup>c</sup></u> | <u>0.080</u> | <b>2.6<sup>a</sup></b>  | <b>0.023</b> | 0.4                     | 0.152        | 0.4    | 0.172   | 0.7                      | 0.201        |
| <b>PHC Model</b>                                                                      |                         |              |                         |              |                         |              |        |         |                          |              |
| PHC Model (EAB=0, FHS=1)                                                              | -13.1                   | 0.665        | <b>-6.0<sup>a</sup></b> | <b>0.030</b> | <u>-1.2<sup>c</sup></u> | <u>0.062</u> | -0.3   | 0.761   | <u>-2.3<sup>c</sup></u>  | <u>0.078</u> |
| FHS model MHUs (n=64)                                                                 |                         |              |                         |              |                         |              |        |         |                          |              |
| <b>Socioeconomic variables</b>                                                        |                         |              |                         |              |                         |              |        |         |                          |              |
| Literacy rate in the population aged 10 years or older (%) – Lit.Rt                   | -23.8                   | 0.104        | <u>-2.3<sup>c</sup></u> | <u>0.088</u> | -0.4                    | 0.203        | *      | *       | <b>-1.7<sup>a</sup></b>  | <b>0.002</b> |
| Per capita income (R\$ 100.00) – Income                                               | *                       | *            | *                       | *            | *                       | *            | *      | *       | *                        | *            |
| Percentage of households with a per capita income below minimum wage (%) – Perc.House | *                       | *            | *                       | *            | *                       | *            | *      | *       | *                        | *            |

|                                                                      |                          |              |                         |              |                         |              |      |       |      |       |
|----------------------------------------------------------------------|--------------------------|--------------|-------------------------|--------------|-------------------------|--------------|------|-------|------|-------|
| Percentage of blacks, mulattos and native Brazilians (%) – Pop. Perc | *                        | *            | *                       | *            | *                       | *            | *    | *     | *    | *     |
| <b>40-hour week Physician equivalents per 10,000 inhabitants.</b>    |                          |              |                         |              |                         |              |      |       |      |       |
| Average supply                                                       | -9.6                     | 0.720        | -2.7                    | 0.289        | -0.2                    | 0.736        | -0.9 | 0.136 | -0.8 | 0.402 |
| Family Physician - FP                                                | <u>-38.6<sup>c</sup></u> | <u>0.057</u> | <u>-3.2<sup>c</sup></u> | <u>0.091</u> | <u>-1.1<sup>a</sup></u> | <b>0.016</b> | 0.7  | 0.243 | -0.1 | 0.959 |
| Basic specialists (Clinicians, Pediatrics and Gynecologists) - BSP   | <u>-87.0<sup>c</sup></u> | <u>0.070</u> | -6.4                    | 0.157        | -0.5                    | 0.613        | -0.7 | 0.636 | -2.6 | 0.170 |
| Subspecialty Physicians - SUBP                                       | -0.2                     | 0.997        | 0.3                     | 0.937        | -0.7                    | 0.379        | 0.3  | 0.787 | -0.1 | 0.994 |
| Physicians at the same MHU for 12 months - Total                     | <b>51.2<sup>a</sup></b>  | <b>0.012</b> | <b>4.0<sup>a</sup></b>  | <b>0.026</b> | <u>0.8<sup>c</sup></u>  | <u>0.060</u> | 0.5  | 0.251 | 1.0  | 0.107 |

<sup>a</sup> Value p<0.05. <sup>c</sup> Value p<0.10.

Some results were only statistically significant at 10%, as follows: 1) FHS model and lower HACSC rates for HF and BP; 2) FP Equivalent and lower total hospitalization and HACSC rates in FHS model MHUs; 3) BSP Equivalent and lower total hospitalization rate in FHS model MHUs; 4) Total Equivalent and higher total hospitalization rate in total MHUs and higher HACSC rates for HF under the FHS model; and 5) Lit.Rt and lower HACSC rates under the FHS model.

## DISCUSSION:

In the present study, after adjustment for age and sex and control of socioeconomic variables, low HACSC rates were significantly associated with the FHS model and the presence of FP in the municipality of Curitiba (PR). No significant associations were observed between HACSC and other medical specialties, with worse results found for the total number of doctors present over the 12-month study.

The association between the FHS model and low HACSC rates is consistent with other studies.(12,13,15) Although Curitiba exhibited one of the lowest HACSC rates among Brazilian capitals, the difference between the models (FHS and EAB) was equivalent to 13% of the municipality's HACSC for the period. The FHS model was also correlated with fewer hospitalizations for HF and BP, both statistically significant at 10%. These results reinforce the knowledge accumulated in the literature, which justify maintaining, expanding and consolidating this strategy in the country, even in socially and economically developed municipalities such as Curitiba.

1  
2  
3 Among the FHS model units, the presence of FP was significantly associated with lower  
4 hospitalization rates for HF, the main cause of HACSC in the elderly population of Curitiba  
5 during the study period. The presence of one 40-hour work week FP per 10,000 inhabitants  
6 was related to 14% fewer hospitalizations for this condition in the municipality. This suggests  
7 that the presence of these professionals could have a potentially significant impact on the  
8 country, since HF is also the main cause of HACSC in Brazil.(19)  
9  
10

11  
12 FP were also significantly associated with the total hospitalization and overall HACSC  
13 rates. Although results were significant at 10% but not 5%, the association was clinically  
14 significant. For every 40-hour work week physician per 10,000 inhabitants, there were 3.2  
15 fewer ACSC-related hospitalizations a year per 10,000 inhabitants. Considering the  
16 recommendation of the 2012 National Primary Care Policy that each FHS team should cover an  
17 average of 3,000 people, based on the results found, one would expect a reduction of 9.6  
18 hospitalizations for ACSCs a year per 10,000 inhabitants, if 3 FP are present in comparison to 3  
19 physicians without this specialty.(9) This could represent a more than 20% drop in the average  
20 for the municipality, regardless of other factors.  
21  
22

23  
24 Despite being associated with the PHC model at 10% significance, hospitalization for  
25 BP, the main cause of HACSC among children (0-14 years), did not appear to be related to the  
26 presence of FP in this study. This can be explained by the fact that BP is an acute condition,  
27 unlike HF. Considering the essential attributes of PHC, the literature indicates a strong overall  
28 relationship between access and HACSC.(20-22) In terms of longitudinal care/continuity,  
29 studies have found an inverse association with only chronic ACSCs.(23,24) Thus, it can be  
30 concluded that the access provided by MHUs is more relevant when treating BP, which is less  
31 influenced by FM specialty. On the other hand, in cases of HF, both access and qualified  
32 longitudinal care are essential to achieve fewer hospitalizations.  
33  
34

35  
36 Hospitalizations for angina, the main cause of HACSCs in the 15 to 64-year age group,  
37 were not associated with any variables, whether socioeconomic or health service-related. The  
38 short study period of 12 months may explain this finding. Moreover, this condition typically  
39 develops over decades and is heavily influenced by risk factors related to the individual's  
40 lifestyle. Although angina is considered an ACSC, the extent to which health care services can  
41 modify its progression is debatable.  
42  
43

44  
45 Basic specialists at the same MHU for the 12-month study period were associated to  
46 lower total hospitalization rate in FHS model MHUs at 10% significance, but not to lower  
47 HACSC rates, which suggests it is a spurious association. Subspecialists at the same MHU for  
48  
49  
50  
51  
52

1  
2  
3 the 12-month study period were not significantly related to any of the dependent variables.  
4 This finding suggests that FM is superior to other specialties in PHC settings in terms of  
5 reducing HACSCs. Contrary to the findings of other studies, the average supply of doctors in  
6 the study period was not associated with any of the dependent variables assessed.(20,22) This  
7 may be due to the adequate supply of physicians in terms of the municipality's needs.  
8 Unexpectedly, the total number of doctors at the same MHU throughout the 12-month study,  
9 almost half of whom were not registered as specialists on official databases, was significantly  
10 related to worse hospitalization rates for some conditions. Although certain limitations of this  
11 study may explain some of these findings, the results strongly suggest that medical specialties  
12 in PHC may play an important role in care quality and the impact of outcomes on health,  
13 whether positive or negative.  
14  
15  
16  
17  
18  
19  
20  
21  
22  
23

#### 24 **Limitations:**

25  
26 With respect to the limitations, the first is inherent to the study design; as such, it  
27 cannot be concluded that the findings presented here on an ecological level necessarily reflect  
28 associations on an individual level. However, the hypothesis that both the PHC model and the  
29 medical specialty best suited to primary care can reduce hospitalizations for ACSCs, one of the  
30 main indicators used to assess the quality of PHC, seems plausible.  
31  
32  
33  
34

35 The study period was too short to properly analyze the outcomes. A study of elderly  
36 individuals in the United States suggested a minimum doctor-patient relationship of 5 to 10  
37 years was needed to obtain a significant variation in the hospitalization rates of these  
38 patients.(25) However, the high turnover rate of PHC physicians in Brazil combined with the  
39 difficulty in collecting older data on municipal health services made it impossible to lengthen  
40 the study period.  
41  
42  
43

44 Working in this study with a small number of the MHUs (109 MHUs in total and 65 FHS  
45 model MHUs) compromised the statistical power and can justify the scarcity of statistically  
46 significant results at the 5% significance. Due to this, we also worked with a 10% significance  
47 level for initially non-significant associations at 5%, in order not to neglect clinically meaningful  
48 results.  
49  
50  
51

52 Some confounding factors potentially relevant to the outcome studied were not  
53 explored in this study. Among these factors, we can mention for example characteristics of the  
54 multiprofessional team, involvement with teaching activities, beginning of professionals and  
55  
56  
57  
58  
59  
60

1  
2  
3 teams work in the area, presence of other social equipment in the territory and the existence  
4 of geographic or socio-organizational barriers to access.  
5

6 Finally, there are two other noteworthy limitations. The study used population data  
7 from the 2010 Census, whereas hospitalization data were from April 2014 to March 2015. In  
8 addition, hospitalization data were obtained from AIH, a hospital reimbursement tool used  
9 exclusively in the public health system with no information on private admissions (funded by  
10 health care plans, health insurance or individuals). However, Curitiba has shown little  
11 population change, with growth estimated at only 7% between 2010 and 2015. This growth is  
12 not homogeneous across the municipality and areas with unfavorable socioeconomic  
13 conditions show the greatest expansion.(26,27) As such, hospitalization rates for the most  
14 vulnerable regions of Curitiba may have been overestimated in relation to other areas in this  
15 study, owing to overestimation of its population in 2015, whose growth potential would have  
16 been greater between 2010 and 2015, and non-notification of private hospital admissions in  
17 wealthier areas. This did not prevent findings of better outcomes associated with the FHS  
18 model and the family medicine specialty, but may explain the absence and/or fragility of other  
19 associations observed as well as the worse outcomes related to the total number of doctors at  
20 the same MHU for 12 months.  
21  
22  
23  
24  
25  
26  
27  
28  
29  
30  
31  
32

### 33 **CONCLUSION:**

34  
35 Based on hospitalization rates adjusted for age and sex and controlled analysis of  
36 socioeconomic factors whose influence on hospitalization is recognized in the literature, the  
37 FHS model was significantly associated with lower HACSC rates and the availability of FP was  
38 significantly correlated with lower HACSC rates due to HF in Curitiba (PR) from April 2014 to  
39 March 2015.  
40  
41  
42  
43

44 The fact that the best outcomes recorded in a major Brazilian municipality known for  
45 its well organized health system were associated with the FHS model reinforces FHS as the  
46 preferred organization model for PHC in Brazil. On the other hand, the statistically significant  
47 association between the presence of FP and lower HF rates, the leading cause of HACSCs  
48 among the elderly in Curitiba, may be an effective means of reducing financial costs and  
49 human suffering, since the aging of the Brazilian population suggest a current and future  
50 increase in chronic disease.  
51  
52  
53  
54  
55

56 It is important to underscore that basic specialties, as well as those in other medical  
57 fields (called subspecialties) were not significantly associated with any HACSCs rates studied.  
58  
59  
60



1  
2  
3 Finally, the association between the total number of doctors at the same MHU for the 12-  
4 month study period, almost half of whom were not specialists, and higher hospitalization rates  
5 calls for urgent reflection on the possibility of iatrogenesis in PHC and the need to implement  
6 mandatory medical specialties after the completion of undergraduate medical courses, as  
7 occurs in several first world countries. The findings of this study should be confirmed by  
8 further in-depth assessments that eliminate or minimize the limitations presented.  
9  
10  
11  
12

### 13 14 15 16 **ACKNOWLEDGMENTS**

17  
18 MPDA gratefully acknowledge Dr. Juliana Oliveira Soares and Dr. Juan G3rvas for the final  
19 revision of the manuscript, and the assistance of Dr. Bruno Musso in earlier stages of this  
20 research. The authors are also grateful to the staff of the Municipal Health Department of  
21 Curitiba/PR (SMS-Curitiba), especially Dr. Luiz Ricardo Stinghen and Dr. Paulo Poli team, for  
22 providing a significant portion of the data used here.  
23  
24  
25  
26  
27

### 28 29 **FOOTNOTES**

- 30  
31  
32  
33  
34  
35  
36  
37  
38  
39  
40  
41  
42  
43  
44  
45  
46  
47  
48  
49  
50  
51  
52  
53  
54  
55  
56  
57  
58  
59  
60
- **Contributors** MPDA conceived the study. MPDA, HES, EMH and WMR designed the study. MPDA collected and organized data. MPDA, HES, EMH, WMR and TA analyzed data. MPDA drafted the manuscript. All the authors revised the article and agreed with the final version and findings.
  - **Funding** None.
  - **Competing interests** MPDA served as vice president for the Family Medicine Association of Brasilia (ABrMFC) Board of Directors from 2014 to 2015. ABrMFC is a non-profit professional and scientific regional association, affiliated with the Brazilian Family Medicine Society (SBMFC).
  - **Ethics approval** This study was approved by the Research Ethics Committees of the Coordinating (FS/UnB, CAAE 42275414.0.0000.0030) and Partner Institutions (SMS-Curitiba, CAAE 42275414.0.3001.0101).
  - **Provenance and peer review** Not commissioned.

- 1
- 2
- 3 • **Data sharing statement** The hospitalization rates, socioeconomic indicators and
- 4 medical workload per MHU have not been published and are available by emailing
- 5 MPDA.
- 6
- 7
- 8
- 9

#### 10 REFERENCES:

- 11
- 12
- 13 1. Starfield B. Atenção Primária: equilíbrio entre necessidades de saúde, serviços e
- 14 tecnologia. Brasília: UNESCO, Ministério da Saúde 2002:43-70.
- 15
- 16 2. Purdy S, Griffin T, Salisbury C, Sharp D. Ambulatory care sensitive conditions:
- 17 terminology and disease coding need to be more specific to aid policy makers and clinicians.
- 18 *Public Health*. Elsevier Ltd 2009;123(2):169–73.
- 19
- 20 3. Agency for Healthcare Research and Quality. Guide to Prevention Quality Indicators:
- 21 Hospital Admission for Ambulatory Care Sensitive Conditions. AHRQ Quality Indicators.
- 22 Rockville, MD: Agency for Healthcare Research and Quality 2007. Report No.: 3.1.
- 23
- 24 4. OECD. Health at a Glance 2015: OECD Indicators. Paris: OECD Publishing 2015:200.
- 25
- 26 5. Viacava F, Ugá MAD, Porto S, Laguardia J, Moreira R da S. Avaliação de Desempenho
- 27 de Sistemas de Saúde: um modelo de análise. *Cien Saude Colet* 2012;17(4):921–34.
- 28 <http://www.scielo.org/pdf/csc/v17n4/v17n4a14> (accessed 18 Jul 2016)
- 29
- 30 6. Billings J, Zeitel L, Lukomnik J, Carey TS, Blank a. E, Newman L. Impact of
- 31 socioeconomic status on hospital use in New York City. *Health Aff* 1993;12(1):162–73.
- 32
- 33 7. Alfradique ME, Bonolo PDF, Dourado I, Lima-Costa MF, Macinko J, Mendonça CS, et al.
- 34 Ambulatory care sensitive hospitalizations: elaboration of Brazilian list as a tool for measuring
- 35 health system performance (Project ICSAP - Brazil). *Cad Saude Publica* 2009;25(6):1337–49.
- 36
- 37 8. Ministério da Saúde. Secretaria de Atenção à Saúde. Portaria no 221, de 17 de abril de
- 38 2008. Seção I, p. 70. Brasil: Diário Oficial da União de 18 de abril de 2008. 2008:1–6.
- 39
- 40 9. BRASIL. Ministério da Saúde. Política Nacional de Atenção Básica - PNAB 2012. Brasília:
- 41 Ministério da Saúde 2012:110. <http://189.28.128.100/dab/docs/publicacoes/geral/pnab.pdf>
- 42 (accessed 18 Jul 2016)
- 43
- 44 10. OPAS. A implantação do modelo de atenção as condições crônicas em Curitiba:
- 45 resultados do laboratório de inovação sobre atenção às condições crônicas na atenção
- 46 primária em saúde. Brasília: Organização Pan-Americana da Saúde, Conselho Nacional de
- 47 Secretários de Saúde 2013:28-46.
- 48
- 49 11. Giovanella L, de Mendonça MHM. Atenção Primária à Saúde. In: Giovanella L, Escorel
- 50 S, Lobato L de VC, Noronha JC de, Carvalho AI de, editors. Políticas e Sistema de Saúde no
- 51 Brasil. Rio de Janeiro: Fiocruz 2008:575-625.
- 52
- 53 12. Fernandes VBL, Caldeira AP, Faria AA De, Rodrigues Neto JF. Internações sensíveis na
- 54 atenção primária como indicador de avaliação da Estratégia Saúde da Família. *Rev Saude*
- 55 *Publica* 2009;43(6):928–36.
- 56
- 57
- 58
- 59
- 60

- 1  
2  
3 13. Guanais F, Macinko J. Primary care and avoidable hospitalizations: evidence from  
4 Brazil. *J Ambul Care Manage* 2009;32(2):115–22.  
5  
6 14. Nedel FB, Facchini LA, Martín-Mateo M, Vieira LAS, Thumé E. Programa Saúde da  
7 Família e condições sensíveis à atenção primária, Bagé (RS). *Rev Saude Publica*  
8 2008;42(6):1041–52.  
9  
10 15. Dourado I, Oliveira VB, Aquino R, Bonolo P, Lima-costa MF, Medina MG, et al. Trends in  
11 Primary Health Care-sensitive Conditions in Brazil. *Med Care* 2011;49(6):577–84.  
12  
13 16. Macinko J, Dourado I, Aquino R, Bonolo P de F, Lima-Costa MF, Medina MG, et al.  
14 Major expansion of primary care in Brazil linked to decline in unnecessary hospitalization.  
15 *Health Aff* 2010;29(12):2149–60.  
16  
17 17. Lermen Junior N. Análise comparativa da avaliação da Atenção Primária à Saúde  
18 prestada por parte de Médicos com e sem especialização em Medicina de Família e  
19 Comunidade atuantes na Estratégia de Saúde da Família do município de Florianópolis – Brasil.  
20 Dissertação de Mestrado. Università di Bologna; 2011:1-49.  
21  
22 18. Curitiba. Prefeitura Municipal. Secretaria Municipal da Saúde. Atenção Primária  
23 2016;1–3. <http://www.saude.curitiba.pr.gov.br/index.php/assistencia/atencao-basica>  
24 (accessed 18 Jul 2016)  
25  
26 19. Rodrigues-Bastos RM, Campos EMS, Ribeiro LC, Bastos Filho MG, Bustamante-Teixeira  
27 MT. Hospitalizations for ambulatory care-sensitive conditions, Minas Gerais, Southeastern  
28 Brazil, 2000 and 2010. *Rev Saude Publica* 2014;48(6):958–67.  
29  
30 20. Rosano A, Loha CA, Falvo R, Van Der Zee J, Ricciardi W, Guasticchi G, et al. The  
31 relationship between avoidable hospitalization and accessibility to primary care: A systematic  
32 review. *Eur J Public Health* 2013;23(3):356–60.  
33  
34 21. Gibson OR, Segal L, Mcdermott RA. A systematic review of evidence on the association  
35 between hospitalisation for chronic disease related ambulatory care sensitive conditions and  
36 primary health care resourcing. *BMC Health Serv Res* 2013;13(1):1.  
37  
38 22. van Loenen T, van den Berg MJ, Westert GP, Faber MJ. Organizational aspects of  
39 primary care related to avoidable hospitalization: a systematic review. *Fam Pra*  
40 2014;31(5):502–16. <http://fampra.oxfordjournals.org/content/31/5/502.long> (accessed 18 Jul  
41 2016)  
42  
43 23. Cabana MD, Jee SH. Does continuity of care improve patient outcomes? *J Fam Pract*  
44 2004;53(12):974–80.  
45  
46 24. Kearley KE, Freeman GK, Heath A. An exploration of the value of the personal doctor-  
47 patient relationship in general practice. *Br J Gen Pract* 2001;51(470):712–8.  
48  
49 25. Weiss LJ, Blustein J. Faithful Patients : The Effect of Long-Term Physician-Patient  
50 Relationships on the Costs and Use of Health Care by Older Americans. *Am J Public Health*  
51 1996;86(12).  
52  
53 26. Curitiba. Prefeitura Municipal. Instituto de Pesquisa e Planejamento Urbano de  
54 Curitiba. Análise do Censo 2010 - População. Curitiba 2012:1-9.  
55 [http://www.ippuc.org.br/visualizar.php?doc=http://admsite2013.ippuc.org.br/arquivos/docu](http://www.ippuc.org.br/visualizar.php?doc=http://admsite2013.ippuc.org.br/arquivos/documentos/D356/D356_003_BR.pdf)  
56 [mentos/D356/D356\\_003\\_BR.pdf](http://www.ippuc.org.br/visualizar.php?doc=http://admsite2013.ippuc.org.br/arquivos/documentos/D356/D356_003_BR.pdf) (accessed 18 Jul 2016)  
57  
58  
59  
60

1  
2  
3  
4  
5  
6  
7  
8  
9  
10  
11  
12  
13  
14  
15  
16  
17  
18  
19  
20  
21  
22  
23  
24  
25  
26  
27  
28  
29  
30  
31  
32  
33  
34  
35  
36  
37  
38  
39  
40  
41  
42  
43  
44  
45  
46  
47  
48  
49  
50  
51  
52  
53  
54  
55  
56  
57  
58  
59  
60

27. BRASIL. Ministério do Planejamento Orçamento e Gestão. Instituto Brasileiro de Geografia e Estatística. Curitiba. IBGE Cidades [Internet] 2016:1–2. <http://cod.ibge.gov.br/8XS> (accessed 18 Jul 2016)

For peer review only

**Title:** Can specializing in Family Medicine reduce Hospitalization for Ambulatory Care Sensitive Conditions? Evidence from a cross-sectional ecological study.

**Authors:** AFONSO, MPD; SHIMIZU, HE; MERCHAN-HAMANN, E; RAMALHO, WM; AFONSO, T

STROBE Statement—Checklist of items that should be included in reports of *cross-sectional studies*

|                              | Item No | Recommendation                                                                                                                                                                                    |             |
|------------------------------|---------|---------------------------------------------------------------------------------------------------------------------------------------------------------------------------------------------------|-------------|
| <b>Title and abstract</b>    | 1       | (a) Indicate the study's design with a commonly used term in the title or the abstract                                                                                                            | <b>YES</b>  |
|                              |         | (b) Provide in the abstract an informative and balanced summary of what was done and what was found                                                                                               | <b>YES</b>  |
| <b>Introduction</b>          |         |                                                                                                                                                                                                   |             |
| Background/rationale         | 2       | Explain the scientific background and rationale for the investigation being reported                                                                                                              | <b>YES</b>  |
| Objectives                   | 3       | State specific objectives, including any prespecified hypotheses                                                                                                                                  | <b>YES</b>  |
| <b>Methods</b>               |         |                                                                                                                                                                                                   |             |
| Study design                 | 4       | Present key elements of study design early in the paper                                                                                                                                           | <b>YES</b>  |
| Setting                      | 5       | Describe the setting, locations, and relevant dates, including periods of recruitment, exposure, follow-up, and data collection                                                                   | <b>YES</b>  |
| Participants                 | 6       | (a) Give the eligibility criteria, and the sources and methods of selection of participants                                                                                                       | <b>YES</b>  |
| Variables                    | 7       | Clearly define all outcomes, exposures, predictors, potential confounders, and effect modifiers. Give diagnostic criteria, if applicable                                                          | <b>YES</b>  |
| Data sources/<br>measurement | 8*      | For each variable of interest, give sources of data and details of methods of assessment (measurement). Describe comparability of assessment methods if there is more than one group              | <b>YES</b>  |
| Bias                         | 9       | Describe any efforts to address potential sources of bias                                                                                                                                         | <b>YES</b>  |
| Study size                   | 10      | Explain how the study size was arrived at                                                                                                                                                         | <b>YES</b>  |
| Quantitative variables       | 11      | Explain how quantitative variables were handled in the analyses. If applicable, describe which groupings were chosen and why                                                                      | <b>YES</b>  |
| Statistical methods          | 12      | (a) Describe all statistical methods, including those used to control for confounding                                                                                                             | <b>YES</b>  |
|                              |         | (b) Describe any methods used to examine subgroups and interactions                                                                                                                               | <b>N.A.</b> |
|                              |         | (c) Explain how missing data were addressed                                                                                                                                                       | <b>N.A.</b> |
|                              |         | (d) If applicable, describe analytical methods taking account of sampling strategy                                                                                                                | <b>N.A.</b> |
|                              |         | (e) Describe any sensitivity analyses                                                                                                                                                             | <b>NO</b>   |
| <b>Results</b>               |         |                                                                                                                                                                                                   |             |
| Participants                 | 13*     | (a) Report numbers of individuals at each stage of study—eg numbers potentially eligible, examined for eligibility, confirmed eligible, included in the study, completing follow-up, and analysed | <b>YES</b>  |
|                              |         | (b) Give reasons for non-participation at each stage                                                                                                                                              | <b>YES</b>  |
|                              |         | (c) Consider use of a flow diagram                                                                                                                                                                | <b>YES</b>  |
| Descriptive data             | 14*     | (a) Give characteristics of study participants (eg demographic, clinical, social) and information on exposures and potential confounders                                                          | <b>YES</b>  |

|                          |     |                                                                                                                                                                                                              |             |
|--------------------------|-----|--------------------------------------------------------------------------------------------------------------------------------------------------------------------------------------------------------------|-------------|
|                          |     | (b) Indicate number of participants with missing data for each variable of interest                                                                                                                          | <b>N.A.</b> |
| Outcome data             | 15* | Report numbers of outcome events or summary measures                                                                                                                                                         | <b>YES</b>  |
| Main results             | 16  | (a) Give unadjusted estimates and, if applicable, confounder-adjusted estimates and their precision (eg, 95% confidence interval). Make clear which confounders were adjusted for and why they were included | <b>YES</b>  |
|                          |     | (b) Report category boundaries when continuous variables were categorized                                                                                                                                    | <b>YES</b>  |
|                          |     | (c) If relevant, consider translating estimates of relative risk into absolute risk for a meaningful time period                                                                                             | <b>YES</b>  |
| Other analyses           | 17  | Report other analyses done—eg analyses of subgroups and interactions, and sensitivity analyses                                                                                                               | <b>NO</b>   |
| <b>Discussion</b>        |     |                                                                                                                                                                                                              |             |
| Key results              | 18  | Summarise key results with reference to study objectives                                                                                                                                                     | <b>YES</b>  |
| Limitations              | 19  | Discuss limitations of the study, taking into account sources of potential bias or imprecision. Discuss both direction and magnitude of any potential bias                                                   | <b>YES</b>  |
| Interpretation           | 20  | Give a cautious overall interpretation of results considering objectives, limitations, multiplicity of analyses, results from similar studies, and other relevant evidence                                   | <b>YES</b>  |
| Generalisability         | 21  | Discuss the generalisability (external validity) of the study results                                                                                                                                        | <b>YES</b>  |
| <b>Other information</b> |     |                                                                                                                                                                                                              |             |
| Funding                  | 22  | Give the source of funding and the role of the funders for the present study and, if applicable, for the original study on which the present article is based                                                | <b>YES</b>  |

\*Give information separately for exposed and unexposed groups.

**Note:** An Explanation and Elaboration article discusses each checklist item and gives methodological background and published examples of transparent reporting. The STROBE checklist is best used in conjunction with this article (freely available on the Web sites of PLoS Medicine at <http://www.plosmedicine.org/>, Annals of Internal Medicine at <http://www.annals.org/>, and Epidemiology at <http://www.epidem.com/>). Information on the STROBE Initiative is available at [www.strobe-statement.org](http://www.strobe-statement.org).

# BMJ Open

## Association between Hospitalization for Ambulatory Care Sensitive Conditions and Primary Health Care physician specialization: a cross-sectional ecological study in Curitiba (Brazil)

|                                 |                                                                                                                                                                                                                                                                                                                                                                   |
|---------------------------------|-------------------------------------------------------------------------------------------------------------------------------------------------------------------------------------------------------------------------------------------------------------------------------------------------------------------------------------------------------------------|
| Journal:                        | <i>BMJ Open</i>                                                                                                                                                                                                                                                                                                                                                   |
| Manuscript ID                   | bmjopen-2016-015322.R1                                                                                                                                                                                                                                                                                                                                            |
| Article Type:                   | Research                                                                                                                                                                                                                                                                                                                                                          |
| Date Submitted by the Author:   | 28-Apr-2017                                                                                                                                                                                                                                                                                                                                                       |
| Complete List of Authors:       | Afonso, Marcelo; Universidade de Brasilia, Dept. Saúde Coletiva Shimizu, Helena; Universidade de Brasilia, Dept. Saúde Coletiva Merchan-Hamann, Edgar; Universidade de Brasilia, Dept. Saúde Coletiva Ramalho, Walter; Universidade de Brasilia, Dept. Saúde Coletiva Afonso, Tarcisio; Fundacao Cultural Dr Pedro Leopoldo, Professional Master's Degree Program |
| <b>Primary Subject Heading</b>: | Public health                                                                                                                                                                                                                                                                                                                                                     |
| Secondary Subject Heading:      | General practice / Family practice, Epidemiology, Health services research                                                                                                                                                                                                                                                                                        |
| Keywords:                       | PRIMARY CARE, PUBLIC HEALTH, EPIDEMIOLOGY                                                                                                                                                                                                                                                                                                                         |
|                                 |                                                                                                                                                                                                                                                                                                                                                                   |

SCHOLARONE™  
Manuscripts

1  
2  
3 **Association between Hospitalization for Ambulatory Care Sensitive Conditions and Primary**  
4 **Health Care physician specialization: a cross-sectional ecological study in Curitiba (Brazil)**  
5

6  
7 Marcelo P D Afonso, Helena E Shimizu, Edgar Merchan-Hamann, Walter M Ramalho, Tarcisio  
8 Afonso  
9

10  
11 Correspondence to Marcelo P D Afonso; pellizzaro@gmail.com  
12

13 *Descriptors: PRIMARY HEALTH CARE, GENERAL PRACTICE, PUBLIC HEALTH, EPIDEMIOLOGY.*  
14

15  
16 **ABSTRACT: Introduction:** Hospitalization for ambulatory care sensitive conditions (HACSCs) is  
17 frequently used as an indicator of the quality and effectiveness of primary health care (PHC)  
18 services around the world. The aim of the present study was to evaluate whether the PHC  
19 model (Family Health Strategy-FHS- x conventional) and the availability of specialized PHC  
20 physicians is associated or not with total hospitalization or HACSCs in the National Health  
21 System (SUS) of the municipality of Curitiba, Paraná state (PR), Brazil. **Methodology:** this is a  
22 cross-sectional ecological study using multiple linear regression with socioeconomic and  
23 professional data from Municipal Health Units (MHUs) between April 1, 2014 and March 31,  
24 2015. **Results:** after adjustment for age and sex and control of socioeconomic variables, the  
25 FHS model was associated with six fewer HACSCs a year per 10,000 inhabitants in relation to  
26 the conventional model and the availability of one Family Physician (FP) at each FHS model  
27 MHU per 10,000 inhabitants was associated with 1.1 fewer HACSCs for heart failure (HF) a year  
28 per 10,000 inhabitants; both results were statistically significant at 5%. Basic Specialists  
29 (Clinicians, Pediatricians and Obstetrician/Gynecologists) and Subspecialists showed no  
30 significant association with HACSC rates. **Conclusion:** these results obtained in a major  
31 Brazilian city reinforce the role of FHS as a priority PHC model in the country and indicate the  
32 potentially significant impact of specializing in Family Medicine on improving the health  
33 conditions of the population.  
34  
35

36  
37  
38  
39  
40  
41  
42  
43  
44  
45 **STRENGTHS AND LIMITATIONS OF THIS STUDY:**

- 46  
47  
48  
49  
50  
51  
52  
53  
54  
55  
56  
57  
58  
59  
60
- This study was carried out in an important Brazilian city with high primary health care service coverage where resources are uniformly distributed among health units regardless of their PHC model, allowing reliable analysis of the association between PHC model, medical specialization and hospitalizations for ambulatory care sensitive conditions.
  - The socioeconomic and hospitalization data used were obtained from reliable official sources.



- Hospitalizations were adjusted for age, sex and socioeconomic variables, important confounders for the outcomes of interest.
- The short duration of PHC physicians' presence in the MHUs assessed (12 months) and the small number of MHUs studied reduced the power of the study.
- The cross-sectional ecological design is unable to establish a causality relationship between the variables studied.

## INTRODUCTION:

Primary health care (PHC) is the first-contact level and the backbone of rational National Health Systems, responsible for providing accessible, continuous, comprehensive and coordinated health care to the population.(1) An important indicator of the quality and effectiveness of this care is the rate of hospitalizations for ambulatory care sensitive conditions (HACSCs).(2-5) These are conditions of needed hospitalization that can be avoided through the provision of timely and qualified PHC services by 1) preventing the onset of disease, 2) adequately controlling acute illness or 3) effectively managing chronic conditions.(6) Brazil has had a National List of Ambulatory Care Sensitive Conditions since 2008.(7,8)

In Brazil, the preferred PHC organization model within the National Health System (SUS) is the Family Health Strategy (FHS).(9) FHS teams consist of a general practitioner, a professional nurse, one or two assistant nurses and 4 to 12 community health agents, caring for 3000 people on average.(9) Nevertheless, the so-called conventional model, based on ambulatory care in the Basic Specialties of Pediatrics, Internal Medicine and Gynecology and Obstetrics persists, particularly in large cities.(10,11) PHC physicians are not legally required to have a specialty. Physicians become specialists in Family Medicine in Brazil after completing two-year Medical Residency program or through a certification examination after 4 years' experience in the field.

Several studies have demonstrated an association between FHS coverage and a decline in HACSCs.(12-15) Between 1999 and 2007, chronic HACSC rates in municipalities with greater FHS coverage were 13% lower in relation to those with less coverage, reaching 23% for hospitalization due to asthma.(16)

A recent study found a significant association between specializing in Family Medicine and the strength of PHC attributes in the FHS of an important Brazilian capital, measured using the PCA-tool.(17) Thus, it can be speculated that specific medical training for PHC in Brazil is

1  
2  
3 related to both major and intermediate health outcomes. If lower HACSC rates are expected  
4 with access to qualified clinical care, medical specialties aimed at training PHC professionals  
5 should, in theory, influence this outcome. However, studies that assess the relationship  
6 between the specialties of PHC physicians and health outcomes remain scarce.  
7  
8

9  
10 The aim of the present study was to evaluate whether the PHC model and the  
11 availability of specialized PHC physicians are associated or not with total hospitalization or  
12 HACSC rates in the National Health System (SUS) of the municipality of Curitiba, Paraná state  
13 (PR).  
14  
15

#### 16 17 18 19 **METHODOLOGY:**

20 This is a cross-sectional ecological study conducted in the municipality of Curitiba (PR),  
21 Brazil. The municipality exhibits high PHC coverage, particularly in terms of FHS, which reached  
22 52% of the population in April 2014.(18) Moreover, a high number of Family Physicians is  
23 reported in comparison to other Brazilian capitals, and health care services have been  
24 computerized for over a decade.(10) The units of analysis were Municipal Health Units  
25 (MHUs), classified as a Family Health Strategy (FHS) or Conventional (EAB) in accordance with  
26 the PHC model of their teams.  
27  
28  
29  
30  
31

#### 32 33 34 35 **Data:**

36 Socioeconomic data by census tract were obtained from 2010 Census databases,  
37 provided by the Brazilian Institute of Geography and Statistics (IBGE).  
38  
39

40 Information on hospital admissions was obtained from the Hospital Information  
41 System (SIH), through registered Hospitalization Authorization Forms (AIH). Inclusion criteria  
42 were single or initial AIH, valid until June 2015, for Curitiba (PR) residents hospitalized in the  
43 municipality between April 1, 2014 and March 31, 2015. Hospital admissions for childbirth  
44 (International Classification of Diseases, 10<sup>th</sup> edition - ICD-10 - O.80 to O.84) were excluded as  
45 physiological events.(7)  
46  
47  
48  
49

50 AIH information and socioeconomic data were aggregated at the level of the MHU  
51 coverage areas, using QuantumGIS software, version 2.10 Pisa. Addresses on AIH were  
52 geocoded using the MMQGIS plugin and GoogleMaps server.  
53  
54

55  
56 Quantitative data and information on the specialties of PHC physicians in Curitiba (PR)  
57 during the study period were obtained from databases of the Curitiba Municipal Health  
58  
59  
60

1  
2  
3 Department (SMS-Curitiba), Regional Board of Medicine for the State of Paraná, Brazilian  
4 Medical Association (AMB), and the National Medical Residency Committee (CNRM).  
5

6  
7 The MHU model and doctors' working hours were used as predictor variables. Doctors  
8 were classified as 1) Family Physicians (FP); 2) Basic Specialty Physicians (BSP); or 3)  
9 Subspecialty Physicians (SUBP) if they had concluded their medical residency through the  
10 CNRM or been awarded a degree by a scientific association recognized by the AMB prior to  
11 May 31, 2015, in the fields of 1) Family Medicine (FM); 2) Internal Medicine, Pediatrics or  
12 Gynecology and Obstetrics; and 3) other Medical Specialties, respectively.  
13  
14  
15

16  
17 The average supply of doctors was calculated using the mean total working hours of  
18 physicians in each MHU during the study period. For physicians who remained at the same  
19 MHU for the 12-month study period, total effective working hours were added to working  
20 hours per category for each MHU, according to the classification above. For each amount, the  
21 ratio of working hours to the total population residing in the MHU coverage area (2010  
22 Census) was calculated. In order to facilitate understanding, variables were presented as "Full  
23 Time Equivalents", which represent the number of physicians with a 40-hour work week.  
24  
25  
26  
27

28  
29 As outcome variables for each MHU, total hospitalization rates were calculated, as well  
30 as HACSCs and the main ambulatory care sensitive condition per age group, namely bacterial  
31 pneumonia (BP) in childhood (0-14 years), angina in adulthood (15-64 years) and heart failure  
32 (HF) in the elderly (65 years and older). Hospitalization rates were standardized for age and sex  
33 via the direct method, using the structure of the population of Curitiba (PR) according to the  
34 2010 Census as reference. In order to calculate hospitalization rates, the population in the  
35 respective MHU coverage areas was used as a denominator, in accordance with the 2010  
36 Census. -HACSCs were defined as those for which the "Main Diagnosis" field of the AIH  
37 contained a disease classified by an ICD-10 code as belonging to the Brazilian List of  
38 Ambulatory Care Sensitive Conditions.(8) Due to its high incidence rate, records for which the  
39 main diagnosis was ICD-10 J18.9 (Pneumonia; unspecified organism) were included in this  
40 study as BP.  
41  
42  
43  
44  
45  
46  
47  
48

49 Four socioeconomic variables relevant to the studied outcomes were adopted as  
50 context per MHU: 1) literacy rate in the population aged 10 years or older (Lit.Rt); 2)  
51 percentage of blacks, mulattos and native Brazilians (Pop.Perc); 3) Per capita income (Income);  
52 and 4) percentage of households with a per capita income below half the minimum wage  
53 (Perc.House).  
54  
55  
56  
57  
58  
59  
60

**Data analysis:**

SPSS Statistics software version 18 (PASW Statistics 18) was used for data analysis. Calculation of the variance inflation factor (VIF) identified high collinearity (VIF>5) between the socioeconomic variables Lit.Rt, Pop.Perc and Perc.House, preventing their concomitant use in the analysis, but not between variables related to physician working hours. Working hours per medical category were similar between EAB and FHS model MHUs, except for FP, whose working hours were 15 times higher at FHS model MHUs than conventional (EAB) units.

In order to estimate the effects of predictor variables independently of socioeconomic variables, hierarchical linear regression with stepwise-backward elimination was carried out for each dependent variable studied, with an F-to-enter statistic of 0.10 and F-to-remove of 0.20, initially for all the MHUs and subsequently for FHS model MHUs. The variable related to the FP category was only used in the latter given its significant association with this model.

Two models were constructed. Model 1 included the variable "Income" and, among the socioeconomic variables exhibiting high collinearity, the variable with the greatest Beta value in simple regression for the dependent variable under study. Variables with a p-value lower than 0.20 were maintained and fixed for model 2, which included the other variables under study. The results were presented as non-standardized coefficients and considered significant at 5%. Results significant at 10% were identified for HACSCs.

**RESULTS:**

The study included 109 MHUs, 44 (40.4%) of which were conventional (EAB) and 65 (59.6%) applied the FHS model. Of the FHS model MHUs, one (0.9%) was created during the study period. In April 2015, SMS-Curitiba had 512 PHC physicians, 433 of which remained at the same MHU throughout the 12-month study period. Seventy-seven (17.8%) were classified as FP; 117 (27.0%) as BSP; 37 (8.5%) as SUBP, and 202 (46.7%) had no specialty recognized by the CNRM or AMB.

Figure 1 shows the selection of AIH for analysis according to inclusion and exclusion criteria. The mean values of each variable studied are shown in Table 1, accompanied by standard deviation.

1  
2  
3 Figure 1. Selection of AIH for analysis according to inclusion and exclusion criteria.  
4  
5  
6  
7  
8  
9  
10  
11  
12  
13  
14  
15  
16  
17  
18  
19  
20  
21  
22  
23  
24  
25  
26  
27  
28  
29  
30  
31  
32  
33  
34  
35  
36  
37  
38  
39  
40  
41  
42  
43  
44  
45  
46  
47  
48  
49  
50  
51  
52  
53  
54  
55  
56  
57  
58  
59  
60

Table 1. Means and standard deviations for socioeconomic variables, hospitalization rates, and full time equivalents according to MHU models. Curitiba (PR), Brazil.

| Study variables                                                                       | EAB (n=44 MHUs) |                    | FHS (n=65 MHUs) |                    | Total (n=109 MHUs) |                    |
|---------------------------------------------------------------------------------------|-----------------|--------------------|-----------------|--------------------|--------------------|--------------------|
|                                                                                       | Mean            | Standard deviation | Mean            | Standard deviation | Mean               | Standard deviation |
| <b>Socioeconomic variables</b>                                                        |                 |                    |                 |                    |                    |                    |
| Literacy rate in the population aged 10 years or older (%) – Lit.Rt                   | 98.4            | 0.7                | 96.8            | 1.4                | 97.4               | 1.4                |
| Percentage of blacks, mulattos and native Brazilians (%) – Pop. Perc                  | 16.8            | 5.4                | 27.6            | 8.2                | 23.2               | 8.9                |
| Per capita income (R\$) – Income                                                      | 1,232.57        | 493.16             | 777.17          | 429.07             | 961.00             | 506.28             |
| Percentage of households with a per capita income below minimum wage (%) – Perc.House | 6.0             | 2.6                | 12.6            | 5.8                | 10.0               | 5.8                |
| <b>Hospitalization rates per year per 10,000 inhabitants</b>                          |                 |                    |                 |                    |                    |                    |
| Total                                                                                 | 418.7           | 127.9              | 499.4           | 154.0              | 466.8              | 148.9              |
| HACSCs                                                                                | 46.0            | 13.7               | 47.7            | 14.2               | 47.0               | 14.0               |
| Bacterial Pneumonia - BP                                                              | 11.8            | 5.9                | 12.9            | 6.2                | 12.5               | 6.1                |
| Angina                                                                                | 8.2             | 3.2                | 8.3             | 4.2                | 8.3                | 3.9                |
| Heart Failure - HF                                                                    | 8.0             | 2.9                | 7.7             | 3.2                | 7.8                | 3.1                |
| <b>Full time equivalents per 10,000 inhabitants.</b>                                  |                 |                    |                 |                    |                    |                    |
| Average supply                                                                        | 2.10            | 0.76               | 3.51            | 1.50               | 2.94               | 1.43               |
| Family Physician - FP                                                                 | 0.06            | 0.12               | 0.89            | 1.10               | 0.55               | 0.95               |
| Basic Specialists (Clinicians, Pediatrics and Gynecologists) - BSP                    | 0.75            | 0.47               | 0.21            | 0.40               | 0.43               | 0.50               |
| Subspecialty Physicians - SUBP                                                        | 0.17            | 0.20               | 0.19            | 0.50               | 0.18               | 0.40               |
| Physicians at the same MHU for 12 months - Total                                      | 1.77            | 0.73               | 2.58            | 1.28               | 2.25               | 1.16               |

1  
2  
3 The coverage areas of FHS model MHUs exhibited worse socioeconomic conditions  
4 compared to EAB units. Among FHS model MHUs, a negative association was observed  
5 between Equivalent FP and the variables Lit.Rt and Income. The same was true for the  
6 variables Total Equivalent and SUBP Equivalent, while the opposite was observed for the group  
7 BSP Equivalent.  
8  
9

10  
11 The results of hierarchical linear regression coefficients in models 1 and 2 are  
12 presented in Tables 2 and 3, respectively. Values statistically significant at 5% are identified in  
13 the tables. For HACSCs, results statistically significant at 10% are also marked.  
14  
15

16  
17 Socioeconomic variables were alternately significant for all the dependent variables  
18 when all the MHUs were analyzed, except for angina-related HACSCs, indicating that the better  
19 the socioeconomic conditions, the lower the hospitalization rates. In analysis of FHS model  
20 MHUs, only the association between the Lit.Rt and hospitalization rates for BP was statistically  
21 significant at 5%.  
22  
23

24  
25 The FHS model was associated with fewer HACSCs (on average 6.0 fewer  
26 hospitalizations a year per 10,000 inhabitants in relation to the EAB model), statistically  
27 significant at 5%. A statistically significant association was also observed between the  
28 availability of FP and fewer HACSCs for HF in FHS model MHUs (1.1 fewer hospitalizations a  
29 year per 10,000 inhabitants for every 40-hour week FP per 10,000 inhabitants). The variable  
30 Total equivalent was significantly correlated with higher HACSC rates in all the MHUs, as well  
31 as higher total hospitalization rates and admissions due to ambulatory care sensitive  
32 conditions in FHS model MHUs. The variables Average Supply Equivalent, BSP Equivalent and  
33 SUBP Equivalent were not significantly associated with any of the outcomes studied.  
34  
35  
36  
37  
38  
39  
40  
41  
42  
43  
44  
45  
46  
47  
48  
49  
50  
51  
52  
53  
54  
55  
56  
57  
58  
59  
60

Table 2. Results of hospitalization coefficients and p-values for model 1 of the socioeconomic variable for all MHUs and FHS model MHUs. Curitiba (PR), Brazil.

| Socioeconomic variables                                                               | Total                    |                  | HACSCs                  |                  | Heart Failure - HF      |              | Angina  |         | Bacterial Pneumonia - BP |                  |
|---------------------------------------------------------------------------------------|--------------------------|------------------|-------------------------|------------------|-------------------------|--------------|---------|---------|--------------------------|------------------|
|                                                                                       | Coeff.                   | p value          | Coef f.                 | p value          | Coeff.                  | p value      | Coef f. | p value | Coef f.                  | p value          |
| Total (n=109 MHUs)                                                                    |                          |                  |                         |                  |                         |              |         |         |                          |                  |
| Literacy rate in the population aged 10 years or older (%) – Lit.Rt                   | <b>-55.0<sup>a</sup></b> | <b>&lt;0.001</b> | *                       | *                | -0.1                    | 0.861        | -0.1    | 0.801   | <b>-1.7<sup>a</sup></b>  | <b>&lt;0.001</b> |
| Per capita income (R\$ 100.00) – Income                                               | -5.2 <sup>b</sup>        | 0.129            | <b>-1.2<sup>a</sup></b> | <b>&lt;0.001</b> | <b>-0.2<sup>a</sup></b> | <b>0.007</b> | -0.1    | 0.347   | -0.1                     | 0.382            |
| Percentage of households with a per capita income below minimum wage (%) – Perc.House | *                        | *                | *                       | *                | *                       | *            | *       | *       | *                        | *                |
| Percentage of blacks, mulattos and native Brazilians (%) – Pop. Perc                  | *                        | *                | 0.2                     | 0.504            | *                       | *            | *       | *       | *                        | *                |
| FHS model MHUs (n=64)                                                                 |                          |                  |                         |                  |                         |              |         |         |                          |                  |
| Literacy rate in the population aged 10 years or older (%) – Lit.Rt                   | <b>-42.5<sup>a</sup></b> | <b>0.001</b>     | <b>-3.4<sup>a</sup></b> | <b>0.006</b>     | -0.5 <sup>b</sup>       | 0.059        | *       | *       | <b>-1.7<sup>a</sup></b>  | <b>0.002</b>     |
| Per capita income (R\$ 100.00) – Income                                               | 2.2                      | 0.688            | -0.4                    | 0.440            | -0.1                    | 0.784        | -0.1    | 0.804   | 0.1                      | 0.535            |
| Percentage of households with a per capita income below minimum wage (%) – Perc.House | *                        | *                | *                       | *                | *                       | *            | -0.1    | 0.480   | *                        | *                |
| Percentage of blacks, mulattos and native Brazilians (%) – Pop. Perc                  | *                        | *                | *                       | *                | *                       | *            | *       | *       | *                        | *                |

<sup>a</sup> Value p<0.05. <sup>b</sup> Value p<0.20.



Table 3. Results of hospitalization coefficients and p-values for model 2 of the socioeconomic variables, full time equivalents and PHC model for all MHUs and FHS model MHUs. Curitiba (PR), Brazil.

| Variables                                                                             | Total                   |              | HACSCs                  |              | Heart Failure - HF      |              | Angina |         | Bacterial Pneumonia - BP |              |
|---------------------------------------------------------------------------------------|-------------------------|--------------|-------------------------|--------------|-------------------------|--------------|--------|---------|--------------------------|--------------|
|                                                                                       | Coeff.                  | p value      | Coeff.                  | p value      | Coeff.                  | p value      | Coeff. | p value | Coeff.                   | p value      |
| Total (n=109 MHUs)                                                                    |                         |              |                         |              |                         |              |        |         |                          |              |
| <b>Socioeconomic variables</b>                                                        |                         |              |                         |              |                         |              |        |         |                          |              |
| Literacy rate in the population aged 10 years or older (%) – Lit.Rt                   | -32.5 <sup>a</sup>      | 0.015        | *                       | *            | *                       | *            | *      | *       | -2.1 <sup>a</sup>        | 0.000        |
| Per capita income (R\$ 100.00) – Income                                               | -4.9                    | 0.151        | -1.2 <sup>a</sup>       | 0.000        | -0.2 <sup>a</sup>       | 0.001        | *      | *       | *                        | *            |
| Percentage of households with a per capita income below minimum wage (%) – Perc.House | *                       | *            | *                       | *            | *                       | *            | *      | *       | *                        | *            |
| Percentage of blacks, mulattos and native Brazilians (%) – Pop. Perc                  | *                       | *            | *                       | *            | *                       | *            | *      | *       | *                        | *            |
| <b>Full time equivalents per 10,000 inhabitants.</b>                                  |                         |              |                         |              |                         |              |        |         |                          |              |
| Average supply                                                                        | -25.8                   | 0.187        | -2.0                    | 0.260        | -0.5                    | 0.226        | -0.6   | 0.224   | -0.8                     | 0.367        |
| Basic Specialists (Clinicians, Pediatrics and Gynecologists) - BSP                    | -7.5                    | 0.811        | -2.7                    | 0.361        | 0.1                     | 0.920        | -0.7   | 0.427   | -1.3                     | 0.334        |
| Subspecialty Physicians - SUBP                                                        | 14.2                    | 0.644        | 2,2                     | 0.465        | -0.1                    | 0.908        | -0.4   | 0.673   | -0.5                     | 0.697        |
| Physicians at the same MHU for 12 months - Total                                      | <u>22.1<sup>c</sup></u> | <u>0.080</u> | <b>2.6<sup>a</sup></b>  | <b>0.023</b> | 0.4                     | 0.152        | 0.4    | 0.172   | 0.7                      | 0.201        |
| <b>PHC Model</b>                                                                      |                         |              |                         |              |                         |              |        |         |                          |              |
| PHC Model (EAB=0, FHS=1)                                                              | -13.1                   | 0.665        | <b>-6.0<sup>a</sup></b> | <b>0.030</b> | <u>-1.2<sup>c</sup></u> | <u>0.062</u> | -0.3   | 0.761   | <u>-2.3<sup>c</sup></u>  | <u>0.078</u> |
| FHS model MHUs (n=64)                                                                 |                         |              |                         |              |                         |              |        |         |                          |              |
| <b>Socioeconomic variables</b>                                                        |                         |              |                         |              |                         |              |        |         |                          |              |
| Literacy rate in the population aged 10 years or older (%) – Lit.Rt                   | -23.8                   | 0.104        | <u>-2.3<sup>c</sup></u> | <u>0.088</u> | -0.4                    | 0.203        | *      | *       | <b>-1.7<sup>a</sup></b>  | <b>0.002</b> |
| Per capita income (R\$ 100.00) – Income                                               | *                       | *            | *                       | *            | *                       | *            | *      | *       | *                        | *            |
| Percentage of households with a per capita income below minimum wage (%) – Perc.House | *                       | *            | *                       | *            | *                       | *            | *      | *       | *                        | *            |

|                                                                      |                          |              |                         |              |                         |              |      |       |      |       |  |
|----------------------------------------------------------------------|--------------------------|--------------|-------------------------|--------------|-------------------------|--------------|------|-------|------|-------|--|
| Percentage of blacks, mulattos and native Brazilians (%) – Pop. Perc | *                        | *            | *                       | *            | *                       | *            | *    | *     | *    | *     |  |
| <b>Full time equivalents per 10,000 inhabitants.</b>                 |                          |              |                         |              |                         |              |      |       |      |       |  |
| Average supply                                                       | -9.6                     | 0.720        | -2.7                    | 0.289        | -0.2                    | 0.736        | -0.9 | 0.136 | -0.8 | 0.402 |  |
| Family Physician - FP                                                | <u>-38.6<sup>c</sup></u> | <u>0.057</u> | <u>-3.2<sup>c</sup></u> | <u>0.091</u> | <b>-1.1<sup>a</sup></b> | <b>0.016</b> | 0.7  | 0.243 | -0.1 | 0.959 |  |
| Basic Specialists (Clinicians, Pediatrics and Gynecologists) - BSP   | <u>-87.0<sup>c</sup></u> | <u>0.070</u> | -6.4                    | 0.157        | -0.5                    | 0.613        | -0.7 | 0.636 | -2.6 | 0.170 |  |
| Subspecialty Physicians - SUBP                                       | -0.2                     | 0.997        | 0.3                     | 0.937        | -0.7                    | 0.379        | 0.3  | 0.787 | -0.1 | 0.994 |  |
| Physicians at the same MHU for 12 months - Total                     | <b>51.2<sup>a</sup></b>  | <b>0.012</b> | <b>4.0<sup>a</sup></b>  | <b>0.026</b> | <u>0.8<sup>c</sup></u>  | <u>0.060</u> | 0.5  | 0.251 | 1.0  | 0.107 |  |

<sup>a</sup> Value p<0.05. <sup>c</sup> Value p<0.10.

Some results were only statistically significant at 10%, as follows: 1) FHS model and lower HACSC rates for HF and BP; 2) FP Equivalent and lower total hospitalization and HACSC rates in FHS model MHUs; 3) BSP Equivalent and lower total hospitalization rate in FHS model MHUs; 4) Total Equivalent and higher total hospitalization rate in total MHUs and higher HACSC rates for HF under the FHS model; and 5) Lit.Rt and lower HACSC rates under the FHS model.

## DISCUSSION:

In the present study, after adjustment for age and sex and control of socioeconomic variables, lower HACSC rates were significantly associated with the FHS model and the presence of FP in the municipality of Curitiba (PR), Brazil. No significant associations were observed between HACSCs and other medical specialties, while worse results were found for the total number of doctors present over the 12-month study.

The association between the FHS model and low HACSC rates is consistent with other studies.(12,13,15) Although Curitiba exhibited one of the lowest HACSC rates among Brazilian capitals, the difference between the models (FHS and EAB) was equivalent to 13% of the municipality's HACSCs for the period. The FHS model was also correlated with fewer hospitalizations for HF and BP, both statistically significant at 10%. These results reinforce the knowledge accumulated in the literature, which justify maintaining, expanding and consolidating this strategy in the country, even in socially and economically developed municipalities such as Curitiba.

1  
2  
3 Among the FHS model units, the presence of FP was significantly associated with lower  
4 hospitalization rates for HF, the main cause of HACSCs in the elderly population of Curitiba  
5 during the study period. The presence of one 40-hour work week FP per 10,000 inhabitants  
6 was related to 14% fewer hospitalizations for this condition in the municipality. This suggests  
7 that the presence of these professionals could have a potentially significant impact on the  
8 country, since HF is also the main cause of HACSCs in Brazil.(19)  
9  
10

11  
12 FP were also significantly associated with the total hospitalization and overall HACSC  
13 rates. Although results were significant at 10% but not 5%, the association was clinically  
14 significant. For every 40-hour work week physician per 10,000 inhabitants, there were 3.2  
15 fewer HACSCs a year per 10,000 inhabitants. Considering the recommendation of the 2012  
16 National Primary Care Policy that each FHS team should cover an average of 3,000 people,  
17 based on the results found, one would expect a reduction of 9.6 HACSCs a year per 10,000  
18 inhabitants, if 3 FP are present in comparison to 3 physicians without this specialty.(9) This  
19 could represent a more than 20% drop in the average for the municipality, regardless of other  
20 factors.  
21  
22

23  
24 Despite being associated with the PHC model at 10% significance, hospitalization for  
25 BP, the main cause of HACSCs among children (0-14 years), did not appear to be related to the  
26 presence of FP in this study. This can be explained by the fact that BP is an acute condition,  
27 unlike HF. Considering the essential attributes of PHC, the literature indicates a strong overall  
28 relationship between access and HACSCs.(20-22) In terms of longitudinal care/continuity,  
29 studies have found an inverse association with only chronic ambulatory care sensitive  
30 conditions.(23,24) Thus, it can be concluded that the access provided by MHUs is more  
31 relevant when treating BP, which is less influenced by FM specialty. On the other hand, in  
32 cases of HF, both access and qualified longitudinal care are essential to achieve fewer  
33 hospitalizations.  
34  
35

36  
37 Hospitalizations for angina, the main cause of HACSC in the 15 to 64-year age group,  
38 were not associated with any variables, whether socioeconomic or health service-related. The  
39 short study period of 12 months may explain this finding. Moreover, this condition typically  
40 develops over decades and is heavily influenced by risk factors related to the individual's  
41 lifestyle. Although angina is considered an ambulatory care sensitive condition, the extent to  
42 which health care services can modify its progression is debatable.  
43  
44

45  
46 Basic Specialists at the same MHU for the 12-month study period were associated to  
47 lower total hospitalization rate in FHS model MHUs at 10% significance, but not to lower  
48  
49  
50  
51  
52  
53  
54

1  
2  
3 HACSC rates, which suggests it is a spurious association. Subspecialists at the same MHU for  
4 the 12-month study period were not significantly related to any of the dependent variables.  
5 This finding suggests that FM is superior to other specialties in PHC settings in terms of  
6 reducing HACSCs. Contrary to the findings of other studies, the average supply of doctors in  
7 the study period was not associated with any of the dependent variables assessed.(20,22) This  
8 may be due to the adequate supply of physicians in terms of the municipality's needs.  
9 Unexpectedly, the total number of doctors at the same MHU throughout the 12-month study,  
10 almost half of whom were not registered as specialists on official databases, was significantly  
11 related to worse hospitalization rates for some conditions. Although certain limitations of this  
12 study may explain some of these findings, the results strongly suggest that medical specialties  
13 in PHC may play an important role in care quality and the impact of outcomes on health,  
14 whether positive or negative.  
15  
16  
17  
18  
19  
20  
21  
22  
23  
24

#### 25 **Limitations:**

26  
27 With respect to the limitations, the first is inherent to the study design; as such, it  
28 cannot be concluded that the findings presented here on an ecological level necessarily reflect  
29 associations on an individual level. However, the hypothesis that both the PHC model and the  
30 medical specialty best suited to primary care can reduce HACSCs, one of the main indicators  
31 used to assess the quality of PHC, seems plausible.  
32  
33  
34  
35

36 The study period was too short to properly analyze the outcomes. A study of elderly  
37 individuals in the United States suggested a minimum doctor-patient relationship of 5 to 10  
38 years was needed to obtain a significant variation in the hospitalization rates of these  
39 patients.(25) However, the high turnover rate of PHC physicians in Brazil combined with the  
40 difficulty in collecting older data on municipal health services made it impossible to lengthen  
41 the study period.  
42  
43  
44  
45

46 The small number of MHUs studied (109 MHUs in total and 65 FHS model MHUs)  
47 compromised the statistical power and may explain the scarcity of statistically significant  
48 results at 5% significance. As such, we also applied a 10% significance level for associations  
49 initially non-significant at 5% so as not to neglect clinically meaningful results  
50  
51

52 Some confounding factors potentially relevant to the outcomes studied were not  
53 explored here. These include characteristics of the multidisciplinary team, involvement with  
54 teaching activities, when professionals and teams began working in the area, presence of other  
55  
56  
57  
58  
59  
60

1  
2  
3 social resources in the area and the existence of geographic or socio-organizational barriers to  
4 access.  
5

6 Finally, there are two other noteworthy limitations. The study used population data  
7 from the 2010 Census, whereas hospitalization data were from April 2014 to March 2015. In  
8 addition, hospitalization data were obtained from AIH, a hospital reimbursement tool used  
9 exclusively in the public health system with no information on private admissions (funded by  
10 health care plans, health insurance or individuals). However, Curitiba has shown little  
11 population change, with growth estimated at only 7% between 2010 and 2015. This growth is  
12 not homogeneous across the municipality and areas with unfavorable socioeconomic  
13 conditions show the greatest expansion.(26,27) As such, hospitalization rates for the most  
14 vulnerable regions of Curitiba may have been overestimated in relation to other areas in this  
15 study, owing to underestimation of its population in 2015, whose growth potential would have  
16 been greater between 2010 and 2015, and non-notification of private hospital admissions in  
17 wealthier areas. This did not prevent findings of better outcomes associated with the FHS  
18 model and the Family Medicine specialty, but may explain the absence and/or fragility of other  
19 associations observed as well as the worse outcomes related to the total number of doctors at  
20 the same MHU for 12 months.  
21  
22  
23  
24  
25  
26  
27  
28  
29  
30  
31  
32

### 33 **CONCLUSION:**

34  
35 Based on hospitalization rates adjusted for age and sex and controlled analysis of  
36 socioeconomic factors whose influence on hospitalization is recognized in the literature, the  
37 FHS model was significantly associated with lower HACSC rates and the availability of FP was  
38 significantly correlated with lower HACSC rates due to HF in Curitiba (PR), Brazil, from April  
39 2014 to March 2015.  
40  
41  
42  
43

44 The fact that the best outcomes recorded in a major Brazilian municipality known for  
45 its well organized health system were associated with the FHS model reinforces FHS as the  
46 preferred organization model for PHC in Brazil. On the other hand, the statistically significant  
47 association between the presence of FP and lower HF rates, the leading cause of HACSCs  
48 among the elderly in Curitiba, may be an effective means of reducing financial costs and  
49 human suffering, since the aging of the Brazilian population suggest a current and future  
50 increase in chronic disease.  
51  
52  
53  
54  
55

56 It is important to underscore that Basic Specialties, as well as those in other medical  
57 fields (called Subspecialties) were not significantly associated with any HACSC rates studied.  
58  
59  
60

1  
2  
3 Finally, the association between the total number of doctors at the same MHU for the 12-  
4 month study period, almost half of whom were not specialists, and higher hospitalization rates  
5 calls for urgent reflection on the possibility of iatrogenesis in PHC and the need to implement  
6 mandatory medical specialties after the completion of undergraduate medical courses, as  
7 occurs in several first world countries. The findings of this study should be confirmed by  
8 further in-depth assessments that eliminate or minimize the limitations presented.  
9  
10  
11  
12

### 13 14 15 16 **ACKNOWLEDGMENTS**

17  
18 MPDA gratefully acknowledge Dr. Juliana Oliveira Soares and Dr. Juan G3rvas for the final  
19 revision of the manuscript, and the assistance of Dr. Bruno Musso in earlier stages of this  
20 research. The authors are also grateful to the staff of the Municipal Health Department of  
21 Curitiba/PR (SMS-Curitiba), especially Dr. Luiz Ricardo Stinghen and Dr. Paulo Poli, for  
22 providing a significant portion of the data used here.  
23  
24  
25  
26  
27

### 28 29 **FOOTNOTES**

- 30  
31  
32  
33  
34  
35  
36  
37  
38  
39  
40  
41  
42  
43  
44  
45  
46  
47  
48  
49  
50  
51  
52  
53  
54  
55  
56  
57  
58  
59  
60
- **Contributors** MPDA conceived the study. MPDA, HES, EMH and WMR designed the study. MPDA collected and organized data. MPDA, HES, EMH, WMR and TA analyzed data. MPDA drafted the manuscript. All the authors revised the article and agreed with the final version and findings.
  - **Funding** None.
  - **Competing interests** MPDA served as vice president for the Family Medicine Association of Brasilia (ABrMFC) Board of Directors from 2014 to 2015. ABrMFC is a non-profit professional and scientific regional association, affiliated with the Brazilian Family Medicine Society (SBMFC).
  - **Ethics approval** This study was approved by the Research Ethics Committees of the Coordinating (FS/UnB, CAAE 42275414.0.0000.0030) and Partner Institutions (SMS-Curitiba, CAAE 42275414.0.3001.0101).
  - **Provenance and peer review** Not commissioned.

- **Data sharing statement** The hospitalization rates, socioeconomic indicators and medical workload per MHU have not been published and are available by emailing MPDA.

## REFERENCES:

1. Starfield B. Primary Care: Balancing Health Needs, Services, and Technology. Oxford: Oxford University Press 1998:19-34.
2. Purdy S, Griffin T, Salisbury C, Sharp D. Ambulatory care sensitive conditions: terminology and disease coding need to be more specific to aid policy makers and clinicians. *Public Health*. Elsevier Ltd 2009;123(2):169–73.
3. Agency for Healthcare Research and Quality. Guide to Prevention Quality Indicators: Hospital Admission for Ambulatory Care Sensitive Conditions. AHRQ Quality Indicators. Rockville, MD: Agency for Healthcare Research and Quality 2007. Report No.: 3.1.
4. OECD. Health at a Glance 2015: OECD Indicators. Paris: OECD Publishing 2015:200.
5. Viacava F, Ugá MAD, Porto S, Laguardia J, Moreira R da S. Avaliação de Desempenho de Sistemas de Saúde: um modelo de análise. *Cien Saude Colet* 2012;17(4):921–34. <http://www.scielo.org/pdf/csc/v17n4/v17n4a14> (accessed 18 Jul 2016)
6. Billings J, Zeitel L, Lukomnik J, Carey TS, Blank a. E, Newman L. Impact of socioeconomic status on hospital use in New York City. *Health Aff* 1993;12(1):162–73.
7. Alfradique ME, Bonolo PDF, Dourado I, Lima-Costa MF, Macinko J, Mendonça CS, et al. Ambulatory care sensitive hospitalizations: elaboration of Brazilian list as a tool for measuring health system performance (Project ICSAP - Brazil). *Cad Saude Publica* 2009;25(6):1337–49.
8. Ministério da Saúde. Secretaria de Atenção à Saúde. Portaria no 221, de 17 de abril de 2008. Seção I, p. 70. Brasil: Diário Oficial da União de 18 de abril de 2008. 2008:1–6.
9. BRASIL. Ministério da Saúde. Política Nacional de Atenção Básica - PNAB 2012. Brasília: Ministério da Saúde 2012:110. <http://189.28.128.100/dab/docs/publicacoes/geral/pnab.pdf> (accessed 18 Jul 2016)
10. OPAS. A implantação do modelo de atenção as condições crônicas em Curitiba: resultados do laboratório de inovação sobre atenção às condições crônicas na atenção primária em saúde. Brasília: Organização Pan-Americana da Saúde, Conselho Nacional de Secretários de Saúde 2013:28-46.
11. Giovanella L, de Mendonça MHM. Atenção Primária à Saúde. In: Giovanella L, Escorel S, Lobato L de VC, Noronha JC de, Carvalho AI de, editors. Políticas e Sistema de Saúde no Brasil. Rio de Janeiro: Fiocruz 2008:575-625.
12. Fernandes VBL, Caldeira AP, Faria AA De, Rodrigues Neto JF. Internações sensíveis na atenção primária como indicador de avaliação da Estratégia Saúde da Família. *Rev Saude Publica* 2009;43(6):928–36.

13. Guanais F, Macinko J. Primary care and avoidable hospitalizations: evidence from Brazil. *J Ambul Care Manage* 2009;32(2):115–22.
14. Nedel FB, Facchini LA, Martín-Mateo M, Vieira LAS, Thumé E. Programa Saúde da Família e condições sensíveis à atenção primária, Bagé (RS). *Rev Saude Publica* 2008;42(6):1041–52.
15. Dourado I, Oliveira VB, Aquino R, Bonolo P, Lima-costa MF, Medina MG, et al. Trends in Primary Health Care-sensitive Conditions in Brazil. *Med Care* 2011;49(6):577–84.
16. Macinko J, Dourado I, Aquino R, Bonolo P de F, Lima-Costa MF, Medina MG, et al. Major expansion of primary care in Brazil linked to decline in unnecessary hospitalization. *Health Aff* 2010;29(12):2149–60.
17. Lermen Junior N. Análise comparativa da avaliação da Atenção Primária à Saúde prestada por parte de Médicos com e sem especialização em Medicina de Família e Comunidade atuantes na Estratégia de Saúde da Família do município de Florianópolis – Brasil. Dissertação de Mestrado. Università di Bologna; 2011:1-49.
18. Curitiba. Prefeitura Municipal. Secretaria Municipal da Saúde. Atenção Primária 2016;1–3. <http://www.saude.curitiba.pr.gov.br/index.php/assistencia/atencao-basica> (accessed 18 Jul 2016)
19. Rodrigues-Bastos RM, Campos EMS, Ribeiro LC, Bastos Filho MG, Bustamante-Teixeira MT. Hospitalizations for ambulatory care-sensitive conditions, Minas Gerais, Southeastern Brazil, 2000 and 2010. *Rev Saude Publica* 2014;48(6):958–67.
20. Rosano A, Loha CA, Falvo R, Van Der Zee J, Ricciardi W, Guasticchi G, et al. The relationship between avoidable hospitalization and accessibility to primary care: A systematic review. *Eur J Public Health* 2013;23(3):356–60.
21. Gibson OR, Segal L, Mcdermott RA. A systematic review of evidence on the association between hospitalisation for chronic disease related ambulatory care sensitive conditions and primary health care resourcing. *BMC Health Serv Res* 2013;13(1):1.
22. van Loenen T, van den Berg MJ, Westert GP, Faber MJ. Organizational aspects of primary care related to avoidable hospitalization: a systematic review. *Fam Pra* 2014;31(5):502–16. <http://fampra.oxfordjournals.org/content/31/5/502.long> (accessed 18 Jul 2016)
23. Cabana MD, Jee SH. Does continuity of care improve patient outcomes? *J Fam Pract* 2004;53(12):974–80.
24. Kearley KE, Freeman GK, Heath A. An exploration of the value of the personal doctor-patient relationship in general practice. *Br J Gen Pract* 2001;51(470):712–8.
25. Weiss LJ, Blustein J. Faithful Patients : The Effect of Long-Term Physician-Patient Relationships on the Costs and Use of Health Care by Older Americans. *Am J Public Health* 1996;86(12).
26. Curitiba. Prefeitura Municipal. Instituto de Pesquisa e Planejamento Urbano de Curitiba. Análise do Censo 2010 - População. Curitiba 2012:1-9. [http://www.ippuc.org.br/visualizar.php?doc=http://admsite2013.ippuc.org.br/arquivos/documentos/D356/D356\\_003\\_BR.pdf](http://www.ippuc.org.br/visualizar.php?doc=http://admsite2013.ippuc.org.br/arquivos/documentos/D356/D356_003_BR.pdf) (accessed 18 Jul 2016)



1  
2  
3 27. BRASIL. Ministério do Planejamento Orçamento e Gestão. Instituto Brasileiro de  
4 Geografia e Estatística. Curitiba. IBGE Cidades [Internet] 2016:1–2. <http://cod.ibge.gov.br/8XS>  
5 (accessed 18 Jul 2016)  
6  
7  
8  
9  
10  
11  
12  
13  
14  
15  
16  
17  
18  
19  
20  
21  
22  
23  
24  
25  
26  
27  
28  
29  
30  
31  
32  
33  
34  
35  
36  
37  
38  
39  
40  
41  
42  
43  
44  
45  
46  
47  
48  
49  
50  
51  
52  
53  
54  
55  
56  
57  
58  
59  
60

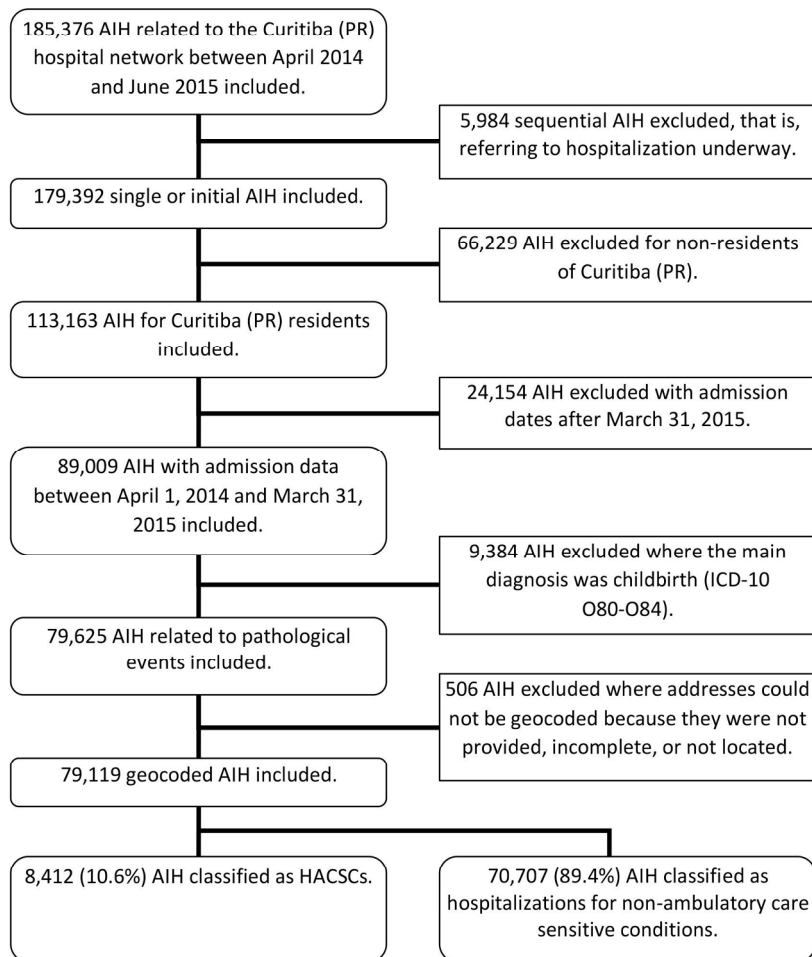

Figure 1. Selection of AIH for analysis according to inclusion and exclusion criteria.

177x202mm (300 x 300 DPI)

**Title:** Association between Hospitalization for Ambulatory Care Sensitive Conditions and Primary Health Care physician specialization: a cross-sectional ecological study in Curitiba (Brazil)

**Authors:** AFONSO, MPD; SHIMIZU, HE; MERCHAN-HAMANN, E; RAMALHO, WM; AFONSO, T

STROBE Statement—Checklist of items that should be included in reports of *cross-sectional studies*

|                            | Item No | Recommendation                                                                                                                                                                                    | Included (page) |
|----------------------------|---------|---------------------------------------------------------------------------------------------------------------------------------------------------------------------------------------------------|-----------------|
| <b>Title and abstract</b>  | 1       | (a) Indicate the study's design with a commonly used term in the title or the abstract                                                                                                            | YES (p. 1)      |
|                            |         | (b) Provide in the abstract an informative and balanced summary of what was done and what was found                                                                                               | YES (p. 1)      |
| <b>Introduction</b>        |         |                                                                                                                                                                                                   |                 |
| Background / rationale     | 2       | Explain the scientific background and rationale for the investigation being reported                                                                                                              | YES (p. 2-3)    |
| Objectives                 | 3       | State specific objectives, including any prespecified hypotheses                                                                                                                                  | YES (p. 3)      |
| <b>Methods</b>             |         |                                                                                                                                                                                                   |                 |
| Study design               | 4       | Present key elements of study design early in the paper                                                                                                                                           | YES (p. 3)      |
| Setting                    | 5       | Describe the setting, locations, and relevant dates, including periods of recruitment, exposure, follow-up, and data collection                                                                   | YES (p.3-4)     |
| Participants               | 6       | (a) Give the eligibility criteria, and the sources and methods of selection of participants                                                                                                       | YES (p. 3-4)    |
| Variables                  | 7       | Clearly define all outcomes, exposures, predictors, potential confounders, and effect modifiers. Give diagnostic criteria, if applicable                                                          | YES (p.4)       |
| Data sources / measurement | 8*      | For each variable of interest, give sources of data and details of methods of assessment (measurement). Describe comparability of assessment methods if there is more than one group              | YES (p. 3-4)    |
| Bias                       | 9       | Describe any efforts to address potential sources of bias                                                                                                                                         | YES (p. 3)      |
| Study size                 | 10      | Explain how the study size was arrived at                                                                                                                                                         | YES (p. 3-4)    |
| Quantitative variables     | 11      | Explain how quantitative variables were handled in the analyses. If applicable, describe which groupings were chosen and why                                                                      | YES (p. 4)      |
| Statistical methods        | 12      | (a) Describe all statistical methods, including those used to control for confounding                                                                                                             | YES (p. 5)      |
|                            |         | (b) Describe any methods used to examine subgroups and interactions                                                                                                                               | YES (p. 5)      |
|                            |         | (c) Explain how missing data were addressed                                                                                                                                                       | YES (p. 6)      |
|                            |         | (d) If applicable, describe analytical methods taking account of sampling strategy                                                                                                                | N.A.            |
|                            |         | (e) Describe any sensitivity analyses                                                                                                                                                             | N.A.            |
| <b>Results</b>             |         |                                                                                                                                                                                                   |                 |
| Participants               | 13*     | (a) Report numbers of individuals at each stage of study—eg numbers potentially eligible, examined for eligibility, confirmed eligible, included in the study, completing follow-up, and analysed | YES (p. 5-6)    |
|                            |         | (b) Give reasons for non-participation at each stage                                                                                                                                              | YES (p. 6)      |
|                            |         | (c) Consider use of a flow diagram                                                                                                                                                                | YES (p. 6)      |

|    |                          |     |                                                                                                                              |
|----|--------------------------|-----|------------------------------------------------------------------------------------------------------------------------------|
| 1  |                          |     |                                                                                                                              |
| 2  | Descriptive data         | 14* | (a) Give characteristics of study participants (eg demographic, clinical, social) and information on exposures and potential |
| 3  |                          |     | confounders                                                                                                                  |
| 4  |                          |     |                                                                                                                              |
| 5  |                          |     | (b) Indicate number of participants with missing data for each                                                               |
| 6  |                          |     | variable of interest                                                                                                         |
| 7  |                          |     |                                                                                                                              |
| 8  | Outcome data             | 15* | Report numbers of outcome events or summary measures                                                                         |
| 9  | Main results             | 16  | (a) Give unadjusted estimates and, if applicable, confounder-                                                                |
| 10 |                          |     | adjusted estimates and their precision (eg, 95% confidence                                                                   |
| 11 |                          |     | interval). Make clear which confounders were adjusted for and why                                                            |
| 12 |                          |     | they were included                                                                                                           |
| 13 |                          |     | (b) Report category boundaries when continuous variables were                                                                |
| 14 |                          |     | categorized                                                                                                                  |
| 15 |                          |     | (c) If relevant, consider translating estimates of relative risk into                                                        |
| 16 |                          |     | absolute risk for a meaningful time period                                                                                   |
| 17 | Other analyses           | 17  | Report other analyses done—eg analyses of subgroups and                                                                      |
| 18 |                          |     | interactions, and sensitivity analyses                                                                                       |
| 19 |                          |     |                                                                                                                              |
| 20 |                          |     |                                                                                                                              |
| 21 |                          |     |                                                                                                                              |
| 22 | <b>Discussion</b>        |     |                                                                                                                              |
| 23 | Key results              | 18  | Summarise key results with reference to study objectives                                                                     |
| 24 | Limitations              | 19  | Discuss limitations of the study, taking into account sources of                                                             |
| 25 |                          |     | potential bias or imprecision. Discuss both direction and magnitude                                                          |
| 26 |                          |     | of any potential bias                                                                                                        |
| 27 |                          |     |                                                                                                                              |
| 28 | Interpretation           | 20  | Give a cautious overall interpretation of results considering                                                                |
| 29 |                          |     | objectives, limitations, multiplicity of analyses, results from similar                                                      |
| 30 |                          |     | studies, and other relevant evidence                                                                                         |
| 31 | Generalisability         | 21  | Discuss the generalisability (external validity) of the study results                                                        |
| 32 |                          |     |                                                                                                                              |
| 33 | <b>Other information</b> |     |                                                                                                                              |
| 34 | Funding                  | 22  | Give the source of funding and the role of the funders for the                                                               |
| 35 |                          |     | present study and, if applicable, for the original study on which the                                                        |
| 36 |                          |     | present article is based                                                                                                     |
| 37 |                          |     |                                                                                                                              |
| 38 |                          |     |                                                                                                                              |

\*Give information separately for exposed and unexposed groups.

**Note:** An Explanation and Elaboration article discusses each checklist item and gives methodological background and published examples of transparent reporting. The STROBE checklist is best used in conjunction with this article (freely available on the Web sites of PLoS Medicine at <http://www.plosmedicine.org/>, Annals of Internal Medicine at <http://www.annals.org/>, and Epidemiology at <http://www.epidem.com/>). Information on the STROBE Initiative is available at [www.strobe-statement.org](http://www.strobe-statement.org).

# BMJ Open

## Association between Hospitalization for Ambulatory Care Sensitive Conditions and Primary Health Care physician specialization: a cross-sectional ecological study in Curitiba (Brazil)

|                                 |                                                                                                                                                                                                                                                                                                                                                                   |
|---------------------------------|-------------------------------------------------------------------------------------------------------------------------------------------------------------------------------------------------------------------------------------------------------------------------------------------------------------------------------------------------------------------|
| Journal:                        | <i>BMJ Open</i>                                                                                                                                                                                                                                                                                                                                                   |
| Manuscript ID                   | bmjopen-2016-015322.R2                                                                                                                                                                                                                                                                                                                                            |
| Article Type:                   | Research                                                                                                                                                                                                                                                                                                                                                          |
| Date Submitted by the Author:   | 29-May-2017                                                                                                                                                                                                                                                                                                                                                       |
| Complete List of Authors:       | Afonso, Marcelo; Universidade de Brasilia, Dept. Saúde Coletiva Shimizu, Helena; Universidade de Brasilia, Dept. Saúde Coletiva Merchan-Hamann, Edgar; Universidade de Brasilia, Dept. Saúde Coletiva Ramalho, Walter; Universidade de Brasilia, Dept. Saúde Coletiva Afonso, Tarcisio; Fundacao Cultural Dr Pedro Leopoldo, Professional Master's Degree Program |
| <b>Primary Subject Heading</b>: | Public health                                                                                                                                                                                                                                                                                                                                                     |
| Secondary Subject Heading:      | General practice / Family practice, Epidemiology, Health services research                                                                                                                                                                                                                                                                                        |
| Keywords:                       | PRIMARY CARE, PUBLIC HEALTH, EPIDEMIOLOGY                                                                                                                                                                                                                                                                                                                         |
|                                 |                                                                                                                                                                                                                                                                                                                                                                   |

SCHOLARONE™  
Manuscripts

1  
2  
3 **Association between Hospitalization for Ambulatory Care Sensitive Conditions and Primary**  
4 **Health Care physician specialization: a cross-sectional ecological study in Curitiba (Brazil)**  
5

6  
7 Marcelo P D Afonso, Helena E Shimizu, Edgar Merchan-Hamann, Walter M Ramalho, Tarcisio  
8 Afonso  
9

10  
11 Correspondence to Marcelo P D Afonso; pellizzaro@gmail.com  
12

13 *Descriptors: PRIMARY HEALTH CARE, GENERAL PRACTICE, PUBLIC HEALTH, EPIDEMIOLOGY.*  
14

15  
16 **ABSTRACT: Introduction:** Hospitalization for ambulatory care sensitive conditions (HACSCs) is  
17 frequently used as an indicator of the quality and effectiveness of primary health care (PHC)  
18 services around the world. The aim of the present study was to evaluate whether the PHC  
19 model (Family Health Strategy-FHS- x conventional) and the availability of specialized PHC  
20 physicians is associated or not with total hospitalization or HACSCs in the National Health  
21 System (SUS) of the municipality of Curitiba, Paraná state (PR), Brazil. **Methodology:** this is a  
22 cross-sectional ecological study using multiple linear regression with socioeconomic and  
23 professional data from Municipal Health Units (MHUs) between April 1, 2014 and March 31,  
24 2015. **Results:** after adjustment for age and sex and control of socioeconomic variables, the  
25 FHS model was associated with six fewer HACSCs a year per 10,000 inhabitants in relation to  
26 the conventional model and the availability of one Family Physician (FP) at each FHS model  
27 MHU per 10,000 inhabitants was associated with 1.1 fewer HACSCs for heart failure (HF) a year  
28 per 10,000 inhabitants. Basic Specialists (Clinicians, Pediatricians and  
29 Obstetrician/Gynecologists) and Subspecialists showed no significant association with HACSC  
30 rates. **Conclusion:** these results obtained in a major Brazilian city reinforce the role of FHS as a  
31 priority PHC model in the country and indicate the potentially significant impact of specializing  
32 in Family Medicine on improving the health conditions of the population.  
33  
34  
35  
36  
37  
38  
39  
40  
41  
42

43 **STRENGTHS AND LIMITATIONS OF THIS STUDY:**  
44

- 45 • This study was carried out in an important Brazilian city with high primary health care  
46 service coverage where resources are uniformly distributed among health units  
47 regardless of their PHC model, allowing reliable analysis of the association between  
48 PHC model, medical specialization and hospitalizations for ambulatory care sensitive  
49 conditions.  
50
- 51 • The socioeconomic and hospitalization data used were obtained from reliable official  
52 sources.  
53  
54  
55  
56  
57  
58  
59  
60

- Hospitalizations were adjusted for age, sex and socioeconomic variables, important confounders for the outcomes of interest.
- The short duration of PHC physicians' presence in the MHUs assessed (12 months) and the small number of MHUs studied reduced the power of the study.
- The cross-sectional ecological design is unable to establish a causality relationship between the variables studied.

## INTRODUCTION:

Primary health care (PHC) is the first-contact level and the backbone of rational National Health Systems, responsible for providing accessible, continuous, comprehensive and coordinated health care to the population.(1) An important indicator of the quality and effectiveness of this care is the rate of hospitalizations for ambulatory care sensitive conditions (HACSCs).(2-5) These are conditions of needed hospitalization that can be avoided through the provision of timely and qualified PHC services by 1) preventing the onset of disease, 2) adequately controlling acute illness or 3) effectively managing chronic conditions.(6) Brazil has had a National List of Ambulatory Care Sensitive Conditions since 2008.(7,8)

In Brazil, the preferred PHC organization model within the National Health System (SUS) is the Family Health Strategy (FHS).(9) FHS teams consist of a general practitioner, a professional nurse, one or two assistant nurses and 4 to 12 community health agents, caring for 3000 people on average.(9) Nevertheless, the so-called conventional model, based on ambulatory care in the Basic Specialties of Pediatrics, Internal Medicine and Gynecology and Obstetrics persists, particularly in large cities.(10,11) PHC physicians are not legally required to have a specialty. Physicians become specialists in Family Medicine in Brazil after completing two-year Medical Residency program or through a certification examination after 4 years' experience in the field.

Several studies have demonstrated an association between FHS coverage and a decline in HACSCs.(12-15) Between 1999 and 2007, chronic HACSC rates in municipalities with greater FHS coverage were 13% lower in relation to those with less coverage, reaching 23% for hospitalization due to asthma.(16)

A recent study found a significant association between specializing in Family Medicine and the strength of PHC attributes in the FHS of an important Brazilian capital, measured using the PCA-tool.(17) Thus, it can be speculated that specific medical training for PHC in Brazil is

1  
2  
3 related to both major and intermediate health outcomes. If lower HACSC rates are expected  
4 with access to qualified clinical care, medical specialties aimed at training PHC professionals  
5 should, in theory, influence this outcome. However, studies that assess the relationship  
6 between the specialties of PHC physicians and health outcomes remain scarce.  
7  
8

9  
10 The aim of the present study was to evaluate whether the PHC model and the  
11 availability of specialized PHC physicians are associated or not with total hospitalization or  
12 HACSC rates in the National Health System (SUS) of the municipality of Curitiba, Paraná state  
13 (PR), Brazil.  
14  
15

#### 16 17 18 19 **METHODOLOGY:**

20 This is a cross-sectional ecological study conducted in the municipality of Curitiba (PR),  
21 Brazil. The municipality exhibits high PHC coverage, particularly in terms of FHS, which reached  
22 52% of the population in April 2014.(18) Moreover, a high number of Family Physicians is  
23 reported in comparison to other Brazilian capitals, and health care services have been  
24 computerized for over a decade.(10) The units of analysis were Municipal Health Units  
25 (MHUs), classified as a Family Health Strategy (FHS) or Conventional (EAB) in accordance with  
26 the PHC model of their teams.  
27  
28  
29  
30  
31

#### 32 33 34 35 **Data:**

36 Socioeconomic data by census tract were obtained from 2010 Census databases,  
37 provided by the Brazilian Institute of Geography and Statistics (IBGE).  
38  
39

40 Information on hospital admissions was obtained from the Hospital Information  
41 System (SIH), through registered Hospitalization Authorization Forms (AIH). Inclusion criteria  
42 were single or initial AIH, valid until June 2015, for Curitiba (PR) residents hospitalized in the  
43 municipality between April 1, 2014 and March 31, 2015. Hospital admissions for childbirth  
44 (International Classification of Diseases, 10<sup>th</sup> edition - ICD-10 - O.80 to O.84) were excluded as  
45 physiological events.(7)  
46  
47  
48  
49

50 AIH information and socioeconomic data were aggregated at the level of the MHU  
51 coverage areas, using QuantumGIS software, version 2.10 Pisa. Addresses on AIH were  
52 geocoded using the MMQGIS plugin and GoogleMaps server.  
53  
54

55  
56 Quantitative data and information on the specialties of PHC physicians in Curitiba (PR)  
57 during the study period were obtained from databases of the Curitiba Municipal Health  
58  
59  
60



1  
2  
3 Department (SMS-Curitiba), Regional Board of Medicine for the State of Paraná, Brazilian  
4 Medical Association (AMB), and the National Medical Residency Committee (CNRM).  
5

6  
7 The MHU model and doctors' working hours were used as predictor variables. Doctors  
8 were classified as 1) Family Physicians (FP); 2) Basic Specialty Physicians (BSP); or 3)  
9 Subspecialty Physicians (SUBP) if they had concluded their medical residency through the  
10 CNRM or been awarded a degree by a scientific association recognized by the AMB prior to  
11 May 31, 2015, in the fields of 1) Family Medicine (FM); 2) Internal Medicine, Pediatrics or  
12 Gynecology and Obstetrics; and 3) other Medical Specialties, respectively.  
13  
14  
15

16  
17 The average supply of doctors was calculated using the mean total working hours of  
18 physicians in each MHU during the study period. For physicians who remained at the same  
19 MHU for the 12-month study period, total effective working hours were added to working  
20 hours per category for each MHU, according to the classification above. For each amount, the  
21 ratio of working hours to the total population residing in the MHU coverage area (2010  
22 Census) was calculated. In order to facilitate understanding, variables were presented as "Full  
23 Time Equivalents", which represent the number of physicians with a 40-hour work week.  
24  
25  
26  
27  
28

29 As outcome variables for each MHU, total hospitalization rates were calculated, as well  
30 as HACSCs and the main ambulatory care sensitive condition per age group, namely bacterial  
31 pneumonia (BP) in childhood (0-14 years), angina in adulthood (15-64 years) and heart failure  
32 (HF) in the elderly (65 years and older). Hospitalization rates were standardized for age and sex  
33 via the direct method, using the structure of the population of Curitiba (PR) according to the  
34 2010 Census as reference. In order to calculate hospitalization rates, the population in the  
35 respective MHU coverage areas was used as a denominator, in accordance with the 2010  
36 Census. HACSCs were defined as those for which the "Main Diagnosis" field of the AIH  
37 contained a disease classified by an ICD-10 code as belonging to the Brazilian List of  
38 Ambulatory Care Sensitive Conditions.<sup>(8)</sup> Due to its high incidence rate, records for which the  
39 main diagnosis was ICD-10 J18.9 (Pneumonia; unspecified organism) were included in this  
40 study as BP.  
41  
42  
43  
44  
45  
46  
47  
48

49 Four socioeconomic variables relevant to the studied outcomes were adopted as  
50 context per MHU: 1) literacy rate in the population aged 10 years or older (Lit.Rt); 2)  
51 percentage of blacks, mulattos and native Brazilians (Pop.Perc); 3) Per capita income (Income);  
52 and 4) percentage of households with a per capita income below half the minimum wage  
53 (Perc.House).  
54  
55  
56  
57  
58  
59  
60

**Data analysis:**

SPSS Statistics software version 18 (PASW Statistics 18) was used for data analysis. Calculation of the variance inflation factor (VIF) identified high collinearity (VIF>5) between the socioeconomic variables Lit.Rt, Pop.Perc and Perc.House, preventing their concomitant use in the analysis, but not between variables related to physician working hours. Working hours per medical category were similar between EAB and FHS model MHUs, except for FP, whose working hours were 15 times higher at FHS model MHUs than conventional (EAB) units.

In order to estimate the effects of predictor variables independently of socioeconomic variables, hierarchical linear regression with stepwise-backward elimination was carried out for each dependent variable studied, with an F-to-enter statistic of 0.10 and F-to-remove of 0.20, initially for all the MHUs and subsequently for FHS model MHUs. The variable related to the FP category was only used in the latter given its significant association with this model.

Two models were constructed. Model 1 included the variable "Income" and, among the socioeconomic variables exhibiting high collinearity, the variable with the greatest Beta value in simple regression for the dependent variable under study. Variables with a p-value lower than 0.20 were maintained and fixed for model 2, which included the other variables under study. The results were presented as non-standardized coefficients and considered significant at 5%. Results significant at 10% were identified for HACSCs.

**RESULTS:**

The study included 109 MHUs, 44 (40.4%) of which were conventional (EAB) and 65 (59.6%) applied the FHS model. Of the FHS model MHUs, one (0.9%) was created during the study period. In April 2015, SMS-Curitiba had 512 PHC physicians, 433 of which remained at the same MHU throughout the 12-month study period. Seventy-seven (17.8%) were classified as FP; 117 (27.0%) as BSP; 37 (8.5%) as SUBP, and 202 (46.7%) had no specialty recognized by the CNRM or AMB.

Figure 1 shows the selection of AIH for analysis according to inclusion and exclusion criteria. The mean values of each variable studied are shown in Table 1, accompanied by standard deviation.

Figure 1. Selection of AIH for analysis according to inclusion and exclusion criteria.

For peer review only

Table 1. Means and standard deviations for socioeconomic variables, hospitalization rates, and full time equivalents according to MHU models. Curitiba (PR), Brazil.

| Study variables                                                                       | EAB (n=44 MHUs) |                    | FHS (n=65 MHUs) |                    | Total (n=109 MHUs) |                    |
|---------------------------------------------------------------------------------------|-----------------|--------------------|-----------------|--------------------|--------------------|--------------------|
|                                                                                       | Mean            | Standard deviation | Mean            | Standard deviation | Mean               | Standard deviation |
| <b>Socioeconomic variables</b>                                                        |                 |                    |                 |                    |                    |                    |
| Literacy rate in the population aged 10 years or older (%) – Lit.Rt                   | 98.4            | 0.7                | 96.8            | 1.4                | 97.4               | 1.4                |
| Percentage of blacks, mulattos and native Brazilians (%) – Pop. Perc                  | 16.8            | 5.4                | 27.6            | 8.2                | 23.2               | 8.9                |
| Per capita income (R\$) – Income                                                      | 1,232.57        | 493.16             | 777.17          | 429.07             | 961.00             | 506.28             |
| Percentage of households with a per capita income below minimum wage (%) – Perc.House | 6.0             | 2.6                | 12.6            | 5.8                | 10.0               | 5.8                |
| <b>Hospitalization rates per year per 10,000 inhabitants</b>                          |                 |                    |                 |                    |                    |                    |
| Total                                                                                 | 418.7           | 127.9              | 499.4           | 154.0              | 466.8              | 148.9              |
| HACSCs                                                                                | 46.0            | 13.7               | 47.7            | 14.2               | 47.0               | 14.0               |
| Bacterial Pneumonia - BP                                                              | 11.8            | 5.9                | 12.9            | 6.2                | 12.5               | 6.1                |
| Angina                                                                                | 8.2             | 3.2                | 8.3             | 4.2                | 8.3                | 3.9                |
| Heart Failure - HF                                                                    | 8.0             | 2.9                | 7.7             | 3.2                | 7.8                | 3.1                |
| <b>Full time equivalents per 10,000 inhabitants.</b>                                  |                 |                    |                 |                    |                    |                    |
| Average supply                                                                        | 2.10            | 0.76               | 3.51            | 1.50               | 2.94               | 1.43               |
| Family Physician - FP                                                                 | 0.06            | 0.12               | 0.89            | 1.10               | 0.55               | 0.95               |
| Basic Specialists (Clinicians, Pediatrics and Gynecologists) - BSP                    | 0.75            | 0.47               | 0.21            | 0.40               | 0.43               | 0.50               |
| Subspecialty Physicians - SUBP                                                        | 0.17            | 0.20               | 0.19            | 0.50               | 0.18               | 0.40               |
| Physicians at the same MHU for 12 months - Total                                      | 1.77            | 0.73               | 2.58            | 1.28               | 2.25               | 1.16               |

1  
2  
3 The coverage areas of FHS model MHUs exhibited worse socioeconomic conditions  
4 compared to EAB units. Among FHS model MHUs, a negative association was observed  
5 between Equivalent FP and the variables Lit.Rt and Income. The same was true for the  
6 variables Total Equivalent and SUBP Equivalent, while the opposite was observed for the group  
7 BSP Equivalent.  
8  
9

10  
11 The results of hierarchical linear regression coefficients in models 1 and 2 are  
12 presented in Tables 2 and 3, respectively. Values statistically significant at 5% are identified in  
13 the tables. For HACSCs, results statistically significant at 10% are also marked.  
14  
15

16  
17 Socioeconomic variables were alternately significant for all the dependent variables  
18 when all the MHUs were analyzed, except for angina-related HACSCs, indicating that the better  
19 the socioeconomic conditions, the lower the hospitalization rates. In analysis of FHS model  
20 MHUs, only the association between the Lit.Rt and hospitalization rates for BP was statistically  
21 significant at 5%.  
22  
23

24  
25 The FHS model was associated with fewer HACSCs (on average 6.0 fewer  
26 hospitalizations a year per 10,000 inhabitants in relation to the EAB model), statistically  
27 significant at 5%. A statistically significant association was also observed between the  
28 availability of FP and fewer HACSCs for HF in FHS model MHUs (1.1 fewer hospitalizations a  
29 year per 10,000 inhabitants for every 40-hour week FP per 10,000 inhabitants). The variable  
30 Total equivalent was significantly correlated with higher HACSC rates in all the MHUs, as well  
31 as higher total hospitalization rates and admissions due to ambulatory care sensitive  
32 conditions in FHS model MHUs. The variables Average Supply Equivalent, BSP Equivalent and  
33 SUBP Equivalent were not significantly associated with any of the outcomes studied.  
34  
35  
36  
37  
38  
39  
40  
41  
42  
43  
44  
45  
46  
47  
48  
49  
50  
51  
52  
53  
54  
55  
56  
57  
58  
59  
60

Table 2. Results of hospitalization coefficients and p-values for model 1 of the socioeconomic variable for all MHUs and FHS model MHUs. Curitiba (PR), Brazil.

| Socioeconomic variables                                                               | Total                    |                  | HACSCs                  |                  | Heart Failure - HF      |              | Angina  |         | Bacterial Pneumonia - BP |                  |
|---------------------------------------------------------------------------------------|--------------------------|------------------|-------------------------|------------------|-------------------------|--------------|---------|---------|--------------------------|------------------|
|                                                                                       | Coeff.                   | p value          | Coef f.                 | p value          | Coeff.                  | p value      | Coef f. | p value | Coef f.                  | p value          |
| Total (n=109 MHUs)                                                                    |                          |                  |                         |                  |                         |              |         |         |                          |                  |
| Literacy rate in the population aged 10 years or older (%) – Lit.Rt                   | <b>-55.0<sup>a</sup></b> | <b>&lt;0.001</b> | *                       | *                | -0.1                    | 0.861        | -0.1    | 0.801   | <b>-1.7<sup>a</sup></b>  | <b>&lt;0.001</b> |
| Per capita income (R\$ 100.00) – Income                                               | -5.2 <sup>b</sup>        | 0.129            | <b>-1.2<sup>a</sup></b> | <b>&lt;0.001</b> | <b>-0.2<sup>a</sup></b> | <b>0.007</b> | -0.1    | 0.347   | -0.1                     | 0.382            |
| Percentage of households with a per capita income below minimum wage (%) – Perc.House | *                        | *                | *                       | *                | *                       | *            | *       | *       | *                        | *                |
| Percentage of blacks, mulattos and native Brazilians (%) – Pop. Perc                  | *                        | *                | 0.2                     | 0.504            | *                       | *            | *       | *       | *                        | *                |
| FHS model MHUs (n=64)                                                                 |                          |                  |                         |                  |                         |              |         |         |                          |                  |
| Literacy rate in the population aged 10 years or older (%) – Lit.Rt                   | <b>-42.5<sup>a</sup></b> | <b>0.001</b>     | <b>-3.4<sup>a</sup></b> | <b>0.006</b>     | -0.5 <sup>b</sup>       | 0.059        | *       | *       | <b>-1.7<sup>a</sup></b>  | <b>0.002</b>     |
| Per capita income (R\$ 100.00) – Income                                               | 2.2                      | 0.688            | -0.4                    | 0.440            | -0.1                    | 0.784        | -0.1    | 0.804   | 0.1                      | 0.535            |
| Percentage of households with a per capita income below minimum wage (%) – Perc.House | *                        | *                | *                       | *                | *                       | *            | -0.1    | 0.480   | *                        | *                |
| Percentage of blacks, mulattos and native Brazilians (%) – Pop. Perc                  | *                        | *                | *                       | *                | *                       | *            | *       | *       | *                        | *                |

<sup>a</sup> Value p<0.05. <sup>b</sup> Value p<0.20.

Table 3. Results of hospitalization coefficients and p-values for model 2 of the socioeconomic variables, full time equivalents and PHC model for all MHUs and FHS model MHUs. Curitiba (PR), Brazil.

| Variables                                                                             | Total                   |              | HACSCs                  |              | Heart Failure - HF      |              | Angina |         | Bacterial Pneumonia - BP |              |
|---------------------------------------------------------------------------------------|-------------------------|--------------|-------------------------|--------------|-------------------------|--------------|--------|---------|--------------------------|--------------|
|                                                                                       | Coeff.                  | p value      | Coeff.                  | p value      | Coeff.                  | p value      | Coeff. | p value | Coeff.                   | p value      |
| Total (n=109 MHUs)                                                                    |                         |              |                         |              |                         |              |        |         |                          |              |
| <b>Socioeconomic variables</b>                                                        |                         |              |                         |              |                         |              |        |         |                          |              |
| Literacy rate in the population aged 10 years or older (%) – Lit.Rt                   | -32.5 <sup>a</sup>      | 0.015        | *                       | *            | *                       | *            | *      | *       | -2.1 <sup>a</sup>        | 0.000        |
| Per capita income (R\$ 100.00) – Income                                               | -4.9                    | 0.151        | -1.2 <sup>a</sup>       | 0.000        | -0.2 <sup>a</sup>       | 0.001        | *      | *       | *                        | *            |
| Percentage of households with a per capita income below minimum wage (%) – Perc.House | *                       | *            | *                       | *            | *                       | *            | *      | *       | *                        | *            |
| Percentage of blacks, mulattos and native Brazilians (%) – Pop. Perc                  | *                       | *            | *                       | *            | *                       | *            | *      | *       | *                        | *            |
| <b>Full time equivalents per 10,000 inhabitants.</b>                                  |                         |              |                         |              |                         |              |        |         |                          |              |
| Average supply                                                                        | -25.8                   | 0.187        | -2.0                    | 0.260        | -0.5                    | 0.226        | -0.6   | 0.224   | -0.8                     | 0.367        |
| Basic Specialists (Clinicians, Pediatrics and Gynecologists) - BSP                    | -7.5                    | 0.811        | -2.7                    | 0.361        | 0.1                     | 0.920        | -0.7   | 0.427   | -1.3                     | 0.334        |
| Subspecialty Physicians - SUBP                                                        | 14.2                    | 0.644        | 2,2                     | 0.465        | -0.1                    | 0.908        | -0.4   | 0.673   | -0.5                     | 0.697        |
| Physicians at the same MHU for 12 months - Total                                      | <u>22.1<sup>c</sup></u> | <u>0.080</u> | <b>2.6<sup>a</sup></b>  | <b>0.023</b> | 0.4                     | 0.152        | 0.4    | 0.172   | 0.7                      | 0.201        |
| <b>PHC Model</b>                                                                      |                         |              |                         |              |                         |              |        |         |                          |              |
| PHC Model (EAB=0, FHS=1)                                                              | -13.1                   | 0.665        | <b>-6.0<sup>a</sup></b> | <b>0.030</b> | <u>-1.2<sup>c</sup></u> | <u>0.062</u> | -0.3   | 0.761   | <u>-2.3<sup>c</sup></u>  | <u>0.078</u> |
| FHS model MHUs (n=64)                                                                 |                         |              |                         |              |                         |              |        |         |                          |              |
| <b>Socioeconomic variables</b>                                                        |                         |              |                         |              |                         |              |        |         |                          |              |
| Literacy rate in the population aged 10 years or older (%) – Lit.Rt                   | -23.8                   | 0.104        | <u>-2.3<sup>c</sup></u> | <u>0.088</u> | -0.4                    | 0.203        | *      | *       | <b>-1.7<sup>a</sup></b>  | <b>0.002</b> |
| Per capita income (R\$ 100.00) – Income                                               | *                       | *            | *                       | *            | *                       | *            | *      | *       | *                        | *            |
| Percentage of households with a per capita income below minimum wage (%) – Perc.House | *                       | *            | *                       | *            | *                       | *            | *      | *       | *                        | *            |

|                                                                      |                          |              |                         |              |                         |              |      |       |      |       |  |
|----------------------------------------------------------------------|--------------------------|--------------|-------------------------|--------------|-------------------------|--------------|------|-------|------|-------|--|
| Percentage of blacks, mulattos and native Brazilians (%) – Pop. Perc | *                        | *            | *                       | *            | *                       | *            | *    | *     | *    | *     |  |
| <b>Full time equivalents per 10,000 inhabitants.</b>                 |                          |              |                         |              |                         |              |      |       |      |       |  |
| Average supply                                                       | -9.6                     | 0.720        | -2.7                    | 0.289        | -0.2                    | 0.736        | -0.9 | 0.136 | -0.8 | 0.402 |  |
| Family Physician - FP                                                | <u>-38.6<sup>c</sup></u> | <u>0.057</u> | <u>-3.2<sup>c</sup></u> | <u>0.091</u> | <b>-1.1<sup>a</sup></b> | <b>0.016</b> | 0.7  | 0.243 | -0.1 | 0.959 |  |
| Basic Specialists (Clinicians, Pediatrics and Gynecologists) - BSP   | <u>-87.0<sup>c</sup></u> | <u>0.070</u> | -6.4                    | 0.157        | -0.5                    | 0.613        | -0.7 | 0.636 | -2.6 | 0.170 |  |
| Subspecialty Physicians - SUBP                                       | -0.2                     | 0.997        | 0.3                     | 0.937        | -0.7                    | 0.379        | 0.3  | 0.787 | -0.1 | 0.994 |  |
| Physicians at the same MHU for 12 months - Total                     | <b>51.2<sup>a</sup></b>  | <b>0.012</b> | <b>4.0<sup>a</sup></b>  | <b>0.026</b> | <u>0.8<sup>c</sup></u>  | <u>0.060</u> | 0.5  | 0.251 | 1.0  | 0.107 |  |

<sup>a</sup> Value p<0.05. <sup>c</sup> Value p<0.10.

Some results were only statistically significant at 10%, as follows: 1) FHS model and lower HACSC rates for HF and BP; 2) FP Equivalent and lower total hospitalization and HACSC rates in FHS model MHUs; 3) BSP Equivalent and lower total hospitalization rate in FHS model MHUs; 4) Total Equivalent and higher total hospitalization rate in total MHUs and higher HACSC rates for HF under the FHS model; and 5) Lit.Rt and lower HACSC rates under the FHS model.

## DISCUSSION:

In the present study, after adjustment for age and sex and control of socioeconomic variables, lower HACSC rates were significantly associated with the FHS model and the presence of FP in the municipality of Curitiba (PR), Brazil. No significant associations were observed between HACSCs and other medical specialties, while worse results were found for the total number of doctors present over the 12-month study.

The association between the FHS model and low HACSC rates is consistent with other studies.(12,13,15) Although Curitiba exhibited one of the lowest HACSC rates among Brazilian capitals, the difference between the models (FHS and EAB) was equivalent to 13% of the municipality's HACSCs for the period. The FHS model was also correlated with fewer hospitalizations for HF and BP, both statistically significant at 10%. These results reinforce the knowledge accumulated in the literature, which justify maintaining, expanding and consolidating this strategy in the country, even in socially and economically developed municipalities such as Curitiba.



1  
2  
3 Among the FHS model units, the presence of FP was significantly associated with lower  
4 hospitalization rates for HF, the main cause of HACSCs in the elderly population of Curitiba  
5 during the study period. The presence of one 40-hour work week FP per 10,000 inhabitants  
6 was related to 14% fewer hospitalizations for this condition in the municipality. This suggests  
7 that the presence of these professionals could have a potentially significant impact on the  
8 country, since HF is also the main cause of HACSCs in Brazil.(19)  
9  
10

11  
12 FP were also significantly associated with the total hospitalization and overall HACSC  
13 rates. Although results were significant at 10% but not 5%, the association was clinically  
14 significant. For every 40-hour work week physician per 10,000 inhabitants, there were 3.2  
15 fewer HACSCs a year per 10,000 inhabitants. Considering the recommendation of the 2012  
16 National Primary Care Policy that each FHS team should cover an average of 3,000 people,  
17 based on the results found, one would expect a reduction of 9.6 HACSCs a year per 10,000  
18 inhabitants, if 3 FP are present in comparison to 3 physicians without this specialty.(9) This  
19 could represent a more than 20% drop in the average for the municipality, regardless of other  
20 factors.  
21  
22

23  
24 Despite being associated with the PHC model at 10% significance, hospitalization for  
25 BP, the main cause of HACSCs among children (0-14 years), did not appear to be related to the  
26 presence of FP in this study. This can be explained by the fact that BP is an acute condition,  
27 unlike HF. Considering the essential attributes of PHC, the literature indicates a strong overall  
28 relationship between access and HACSCs.(20-22) In terms of longitudinal care/continuity,  
29 studies have found an inverse association with only chronic ambulatory care sensitive  
30 conditions.(23,24) Thus, it can be concluded that the access provided by MHUs is more  
31 relevant when treating BP, which is less influenced by FM specialty. On the other hand, in  
32 cases of HF, both access and qualified longitudinal care are essential to achieve fewer  
33 hospitalizations.  
34  
35

36  
37 Hospitalizations for angina, the main cause of HACSC in the 15 to 64-year age group,  
38 were not associated with any variables, whether socioeconomic or health service-related. The  
39 short study period of 12 months may explain this finding. Moreover, this condition typically  
40 develops over decades and is heavily influenced by risk factors related to the individual's  
41 lifestyle. Although angina is considered an ambulatory care sensitive condition, the extent to  
42 which health care services can modify its progression is debatable.  
43  
44

45  
46 Basic Specialists at the same MHU for the 12-month study period were  
47 associated to lower total hospitalization rate in FHS model MHUs at 10% significance, but not  
48  
49  
50  
51  
52  
53  
54

1  
2  
3 to lower HACSC rates, which suggests it is a spurious association. Subspecialists at the same  
4 MHU for the 12-month study period were not significantly related to any of the dependent  
5 variables. This finding suggests that FM is superior to other specialties in PHC settings in terms  
6 of reducing HACSCs. Contrary to the findings of other studies, the average supply of doctors in  
7 the study period was not associated with any of the dependent variables assessed.(20,22) This  
8 may be due to the adequate supply of physicians in terms of the municipality's needs.  
9 Unexpectedly, the total number of doctors at the same MHU throughout the 12-month study,  
10 almost half of whom were not registered as specialists on official databases, was significantly  
11 related to worse hospitalization rates for some conditions. Although certain limitations of this  
12 study may explain some of these findings, the results strongly suggest that medical specialties  
13 in PHC may play an important role in care quality and the impact of outcomes on health,  
14 whether positive or negative.  
15  
16  
17  
18  
19  
20  
21  
22

23 This study includes data from all public admissions to hospitals in Curitiba and all  
24 municipal health units, thereby covering the entire public healthcare system. As such, it  
25 reliably represents the specific scenario of Curitiba. It is conceivable that other large Brazilian  
26 cities with structured PHC coverage, such as Florianopolis and Belo Horizonte, would obtain  
27 similar results. Nevertheless, the associations found in this study should be confirmed by  
28 further research in these cities, in addition to testing whether they are also present in other  
29 scenarios, such as low PHC coverage.  
30  
31  
32  
33  
34  
35  
36  
37

#### 38 **Limitations:**

39 With respect to the limitations, the first is inherent to the study design; as such, it  
40 cannot be concluded that the findings presented here on an ecological level necessarily reflect  
41 associations on an individual level. However, the hypothesis that both the PHC model and the  
42 medical specialty best suited to primary care can reduce HACSCs, one of the main indicators  
43 used to assess the quality of PHC, seems plausible.  
44  
45  
46  
47

48 The study period was too short to properly analyze the outcomes. A study of elderly  
49 individuals in the United States suggested a minimum doctor-patient relationship of 5 to 10  
50 years was needed to obtain a significant variation in the hospitalization rates of these  
51 patients.(25) However, the high turnover rate of PHC physicians in Brazil combined with the  
52 difficulty in collecting older data on municipal health services made it impossible to lengthen  
53 the study period.  
54  
55  
56  
57  
58  
59  
60

1  
2  
3 The small number of MHUs studied (109 MHUs in total and 65 FHS model MHUs)  
4 compromised the statistical power and may explain the scarcity of statistically significant  
5 results at 5% significance. As such, we also applied a 10% significance level for associations  
6 initially non-significant at 5% so as not to neglect clinically meaningful results  
7  
8

9  
10 Some confounding factors potentially relevant to the outcomes studied were not  
11 explored here. These include characteristics of the multidisciplinary team, involvement with  
12 teaching activities, when professionals and teams began working in the area, presence of other  
13 social resources in the area and the existence of geographic or socio-organizational barriers to  
14 access.  
15  
16

17  
18 Finally, there are two other noteworthy limitations. The study used population data  
19 from the 2010 Census, whereas hospitalization data were from April 2014 to March 2015. In  
20 addition, hospitalization data were obtained from AIH, a hospital reimbursement tool used  
21 exclusively in the public health system with no information on private admissions (funded by  
22 health care plans, health insurance or individuals). However, Curitiba has shown little  
23 population change, with growth estimated at only 7% between 2010 and 2015. This growth is  
24 not homogeneous across the municipality and areas with unfavorable socioeconomic  
25 conditions show the greatest expansion.<sup>(26,27)</sup> As such, hospitalization rates for the most  
26 vulnerable regions of Curitiba may have been overestimated in relation to other areas in this  
27 study, owing to underestimation of its population in 2015, whose growth potential would have  
28 been greater between 2010 and 2015, and non-notification of private hospital admissions in  
29 wealthier areas. This did not prevent findings of better outcomes associated with the FHS  
30 model and the Family Medicine specialty, but may explain the absence and/or fragility of other  
31 associations observed as well as the worse outcomes related to the total number of doctors at  
32 the same MHU for 12 months.  
33  
34  
35  
36  
37  
38  
39  
40  
41  
42  
43  
44

#### 45 **CONCLUSION:**

46  
47 Based on hospitalization rates adjusted for age and sex and controlled analysis of  
48 socioeconomic factors whose influence on hospitalization is recognized in the literature, the  
49 FHS model was significantly associated with lower HACSC rates and the availability of FP was  
50 significantly correlated with lower HACSC rates due to HF in Curitiba (PR), Brazil, from April  
51 2014 to March 2015.  
52  
53  
54

55  
56 The fact that the best outcomes recorded in a major Brazilian municipality known for  
57 its well organized health system were associated with the FHS model reinforces FHS as the  
58  
59  
60

1  
2  
3 preferred organization model for PHC in Brazil. On the other hand, the statistically significant  
4 association between the presence of FP and lower HF rates, the leading cause of HACSCs  
5 among the elderly in Curitiba, may be an effective means of reducing financial costs and  
6 human suffering, since the aging of the Brazilian population suggest a current and future  
7 increase in chronic disease.  
8  
9

10  
11 It is important to underscore that Basic Specialties, as well as those in other medical  
12 fields (called Subspecialties) were not significantly associated with any HACSC rates studied.  
13 Finally, the association between the total number of doctors at the same MHU for the 12-  
14 month study period, almost half of whom were not specialists, and higher hospitalization rates  
15 calls for urgent reflection on the possibility of iatrogenesis in PHC and the need to implement  
16 mandatory medical specialties after the completion of undergraduate medical courses, as  
17 occurs in several first world countries. The findings of this study should be confirmed by  
18 further in-depth assessments that eliminate or minimize the limitations presented.  
19  
20  
21  
22  
23  
24  
25  
26

## 27 **ACKNOWLEDGMENTS**

28  
29 MPDA gratefully acknowledge Dr. Juliana Oliveira Soares and Dr. Juan Gérvas for the final  
30 revision of the manuscript, and the assistance of Dr. Bruno Musso in earlier stages of this  
31 research. The authors are also grateful to the staff of the Municipal Health Department of  
32 Curitiba/PR (SMS-Curitiba), especially Dr. Luiz Ricardo Stinghen and Dr. Paulo Poli, for  
33 providing a significant portion of the data used here.  
34  
35  
36  
37  
38  
39  
40

## 41 **FOOTNOTES**

- 42  
43
- 44 • **Contributors** MPDA conceived the study. MPDA, HES, EMH and WMR designed the  
45 study. MPDA collected and organized data. MPDA, HES, EMH, WMR and TA analyzed  
46 data. MPDA drafted the manuscript. All the authors revised the article and agreed with  
47 the final version and findings.  
48
  - 49 • **Funding** None.  
50
  - 51 • **Competing interests** MPDA served as vice president for the Family Medicine  
52 Association of Brasilia (ABrMFC) Board of Directors from 2014 to 2015. ABrMFC is a  
53 non-profit professional and scientific regional association, affiliated with the Brazilian  
54 Family Medicine Society (SBMFC).  
55  
56  
57  
58  
59  
60

- **Ethics approval** This study was approved by the Research Ethics Committees of the Coordinating (FS/UnB, CAAE 42275414.0.0000.0030) and Partner Institutions (SMS-Curitiba, CAAE 42275414.0.3001.0101).
- **Provenance and peer review** Not commissioned.
- **Data sharing statement** The hospitalization rates, socioeconomic indicators and medical workload per MHU have not been published and are available by emailing MPDA.

## REFERENCES:

1. Starfield B. Primary Care: Balancing Health Needs, Services, and Technology. Oxford: Oxford University Press 1998:19-34.
2. Purdy S, Griffin T, Salisbury C, Sharp D. Ambulatory care sensitive conditions: terminology and disease coding need to be more specific to aid policy makers and clinicians. *Public Health*. Elsevier Ltd 2009;123(2):169–73.
3. Agency for Healthcare Research and Quality. Guide to Prevention Quality Indicators: Hospital Admission for Ambulatory Care Sensitive Conditions. AHRQ Quality Indicators. Rockville, MD: Agency for Healthcare Research and Quality 2007. Report No.: 3.1.
4. OECD. Health at a Glance 2015: OECD Indicators. Paris: OECD Publishing 2015:200.
5. Viacava F, Ugá MAD, Porto S, Laguardia J, Moreira R da S. Avaliação de Desempenho de Sistemas de Saúde: um modelo de análise. *Cien Saude Colet* 2012;17(4):921–34. <http://www.scielosp.org/pdf/csc/v17n4/v17n4a14> (accessed 18 Jul 2016)
6. Billings J, Zeitel L, Lukomnik J, Carey TS, Blank a. E, Newman L. Impact of socioeconomic status on hospital use in New York City. *Health Aff* 1993;12(1):162–73.
7. Alfradique ME, Bonolo PDF, Dourado I, Lima-Costa MF, Macinko J, Mendonça CS, et al. Ambulatory care sensitive hospitalizations: elaboration of Brazilian list as a tool for measuring health system performance (Project ICSAP - Brazil). *Cad Saude Publica* 2009;25(6):1337–49.
8. Ministério da Saúde. Secretaria de Atenção à Saúde. Portaria no 221, de 17 de abril de 2008. Seção I, p. 70. Brasil: Diário Oficial da União de 18 de abril de 2008. 2008:1–6.
9. BRASIL. Ministério da Saúde. Política Nacional de Atenção Básica - PNAB 2012. Brasília: Ministério da Saúde 2012:110. <http://189.28.128.100/dab/docs/publicacoes/geral/pnab.pdf> (accessed 18 Jul 2016)
10. OPAS. A implantação do modelo de atenção as condições crônicas em Curitiba: resultados do laboratório de inovação sobre atenção às condições crônicas na atenção primária em saúde. Brasília: Organização Pan-Americana da Saúde, Conselho Nacional de Secretários de Saúde 2013:28-46.

11. Giovanella L, de Mendonça MHM. Atenção Primária à Saúde. In: Giovanella L, Escorel S, Lobato L de VC, Noronha JC de, Carvalho AI de, editors. Políticas e Sistema de Saúde no Brasil. Rio de Janeiro: Fiocruz 2008:575-625.
12. Fernandes VBL, Caldeira AP, Faria AA De, Rodrigues Neto JF. Internações sensíveis na atenção primária como indicador de avaliação da Estratégia Saúde da Família. *Rev Saude Publica* 2009;43(6):928-36.
13. Guanais F, Macinko J. Primary care and avoidable hospitalizations: evidence from Brazil. *J Ambul Care Manage* 2009;32(2):115-22.
14. Nedel FB, Facchini LA, Martín-Mateo M, Vieira LAS, Thumé E. Programa Saúde da Família e condições sensíveis à atenção primária, Bagé (RS). *Rev Saude Publica* 2008;42(6):1041-52.
15. Dourado I, Oliveira VB, Aquino R, Bonolo P, Lima-costa MF, Medina MG, et al. Trends in Primary Health Care-sensitive Conditions in Brazil. *Med Care* 2011;49(6):577-84.
16. Macinko J, Dourado I, Aquino R, Bonolo P de F, Lima-Costa MF, Medina MG, et al. Major expansion of primary care in Brazil linked to decline in unnecessary hospitalization. *Health Aff* 2010;29(12):2149-60.
17. Lermen Junior N. Análise comparativa da avaliação da Atenção Primária à Saúde prestada por parte de Médicos com e sem especialização em Medicina de Família e Comunidade atuantes na Estratégia de Saúde da Família do município de Florianópolis – Brasil. Dissertação de Mestrado. Università di Bologna; 2011:1-49.
18. Curitiba. Prefeitura Municipal. Secretaria Municipal da Saúde. Atenção Primária 2016;1-3. <http://www.saude.curitiba.pr.gov.br/index.php/assistencia/atencao-basica> (accessed 18 Jul 2016)
19. Rodrigues-Bastos RM, Campos EMS, Ribeiro LC, Bastos Filho MG, Bustamante-Teixeira MT. Hospitalizations for ambulatory care-sensitive conditions, Minas Gerais, Southeastern Brazil, 2000 and 2010. *Rev Saude Publica* 2014;48(6):958-67.
20. Rosano A, Loha CA, Falvo R, Van Der Zee J, Ricciardi W, Guasticchi G, et al. The relationship between avoidable hospitalization and accessibility to primary care: A systematic review. *Eur J Public Health* 2013;23(3):356-60.
21. Gibson OR, Segal L, Mcdermott RA. A systematic review of evidence on the association between hospitalisation for chronic disease related ambulatory care sensitive conditions and primary health care resourcing. *BMC Health Serv Res* 2013;13(1):1.
22. van Loenen T, van den Berg MJ, Westert GP, Faber MJ. Organizational aspects of primary care related to avoidable hospitalization: a systematic review. *Fam Pra* 2014;31(5):502-16. <http://fampra.oxfordjournals.org/content/31/5/502.long> (accessed 18 Jul 2016)
23. Cabana MD, Jee SH. Does continuity of care improve patient outcomes? *J Fam Pract* 2004;53(12):974-80.
24. Kearley KE, Freeman GK, Heath A. An exploration of the value of the personal doctor-patient relationship in general practice. *Br J Gen Pract* 2001;51(470):712-8.

- 1  
2  
3 25. Weiss LJ, Blustein J. Faithful Patients : The Effect of Long-Term Physician-Patient  
4 Relationships on the Costs and Use of Health Care by Older Americans. *Am J Public Health*  
5 1996;86(12).  
6
- 7 26. Curitiba. Prefeitura Municipal. Instituto de Pesquisa e Planejamento Urbano de  
8 Curitiba. Análise do Censo 2010 - População. Curitiba 2012:1-9.  
9 [http://www.ippuc.org.br/visualizar.php?doc=http://admsite2013.ippuc.org.br/arquivos/docu](http://www.ippuc.org.br/visualizar.php?doc=http://admsite2013.ippuc.org.br/arquivos/documentos/D356/D356_003_BR.pdf)  
10 [mentos/D356/D356\\_003\\_BR.pdf](http://www.ippuc.org.br/visualizar.php?doc=http://admsite2013.ippuc.org.br/arquivos/documentos/D356/D356_003_BR.pdf) (accessed 18 Jul 2016)  
11
- 12 27. BRASIL. Ministério do Planejamento Orçamento e Gestão. Instituto Brasileiro de  
13 Geografia e Estatística. Curitiba. IBGE Cidades [Internet] 2016:1–2. <http://cod.ibge.gov.br/8XS>  
14 (accessed 18 Jul 2016)  
15  
16  
17  
18  
19  
20  
21  
22  
23  
24  
25  
26  
27  
28  
29  
30  
31  
32  
33  
34  
35  
36  
37  
38  
39  
40  
41  
42  
43  
44  
45  
46  
47  
48  
49  
50  
51  
52  
53  
54  
55  
56  
57  
58  
59  
60



Figure 1. Selection of AIH for analysis according to inclusion and exclusion criteria.

177x202mm (300 x 300 DPI)



**Title:** Association between Hospitalization for Ambulatory Care Sensitive Conditions and Primary Health Care physician specialization: a cross-sectional ecological study in Curitiba (Brazil)

**Authors:** AFONSO, MPD; SHIMIZU, HE; MERCHAN-HAMANN, E; RAMALHO, WM; AFONSO, T

STROBE Statement—Checklist of items that should be included in reports of *cross-sectional studies*

|                            | Item No | Recommendation                                                                                                                                                                                    | Included (page) |
|----------------------------|---------|---------------------------------------------------------------------------------------------------------------------------------------------------------------------------------------------------|-----------------|
| <b>Title and abstract</b>  | 1       | (a) Indicate the study's design with a commonly used term in the title or the abstract                                                                                                            | YES (p. 1)      |
|                            |         | (b) Provide in the abstract an informative and balanced summary of what was done and what was found                                                                                               | YES (p. 1)      |
| <b>Introduction</b>        |         |                                                                                                                                                                                                   |                 |
| Background / rationale     | 2       | Explain the scientific background and rationale for the investigation being reported                                                                                                              | YES (p. 2-3)    |
| Objectives                 | 3       | State specific objectives, including any prespecified hypotheses                                                                                                                                  | YES (p. 3)      |
| <b>Methods</b>             |         |                                                                                                                                                                                                   |                 |
| Study design               | 4       | Present key elements of study design early in the paper                                                                                                                                           | YES (p. 3)      |
| Setting                    | 5       | Describe the setting, locations, and relevant dates, including periods of recruitment, exposure, follow-up, and data collection                                                                   | YES (p.3-4)     |
| Participants               | 6       | (a) Give the eligibility criteria, and the sources and methods of selection of participants                                                                                                       | YES (p. 3-4)    |
| Variables                  | 7       | Clearly define all outcomes, exposures, predictors, potential confounders, and effect modifiers. Give diagnostic criteria, if applicable                                                          | YES (p.4)       |
| Data sources / measurement | 8*      | For each variable of interest, give sources of data and details of methods of assessment (measurement). Describe comparability of assessment methods if there is more than one group              | YES (p. 3-4)    |
| Bias                       | 9       | Describe any efforts to address potential sources of bias                                                                                                                                         | YES (p. 3)      |
| Study size                 | 10      | Explain how the study size was arrived at                                                                                                                                                         | YES (p. 3-4)    |
| Quantitative variables     | 11      | Explain how quantitative variables were handled in the analyses. If applicable, describe which groupings were chosen and why                                                                      | YES (p. 4)      |
| Statistical methods        | 12      | (a) Describe all statistical methods, including those used to control for confounding                                                                                                             | YES (p. 5)      |
|                            |         | (b) Describe any methods used to examine subgroups and interactions                                                                                                                               | YES (p. 5)      |
|                            |         | (c) Explain how missing data were addressed                                                                                                                                                       | YES (p. 6)      |
|                            |         | (d) If applicable, describe analytical methods taking account of sampling strategy                                                                                                                | N.A.            |
|                            |         | (e) Describe any sensitivity analyses                                                                                                                                                             | N.A.            |
| <b>Results</b>             |         |                                                                                                                                                                                                   |                 |
| Participants               | 13*     | (a) Report numbers of individuals at each stage of study—eg numbers potentially eligible, examined for eligibility, confirmed eligible, included in the study, completing follow-up, and analysed | YES (p. 5-6)    |
|                            |         | (b) Give reasons for non-participation at each stage                                                                                                                                              | YES (p. 6)      |
|                            |         | (c) Consider use of a flow diagram                                                                                                                                                                | YES (p. 6)      |

|    |                          |     |                                                                                                                                                                                                              |
|----|--------------------------|-----|--------------------------------------------------------------------------------------------------------------------------------------------------------------------------------------------------------------|
| 1  |                          |     |                                                                                                                                                                                                              |
| 2  | Descriptive data         | 14* | (a) Give characteristics of study participants (eg demographic, clinical, social) and information on exposures and potential confounders                                                                     |
| 3  |                          |     | <b>YES (p. 7)</b>                                                                                                                                                                                            |
| 4  |                          |     |                                                                                                                                                                                                              |
| 5  |                          |     | (b) Indicate number of participants with missing data for each variable of interest                                                                                                                          |
| 6  |                          |     | <b>N.A.</b>                                                                                                                                                                                                  |
| 7  |                          |     |                                                                                                                                                                                                              |
| 8  | Outcome data             | 15* | Report numbers of outcome events or summary measures                                                                                                                                                         |
| 9  |                          |     | <b>YES (p. 7)</b>                                                                                                                                                                                            |
| 10 | Main results             | 16  | (a) Give unadjusted estimates and, if applicable, confounder-adjusted estimates and their precision (eg, 95% confidence interval). Make clear which confounders were adjusted for and why they were included |
| 11 |                          |     | <b>YES (p. 9-11)</b>                                                                                                                                                                                         |
| 12 |                          |     |                                                                                                                                                                                                              |
| 13 |                          |     | (b) Report category boundaries when continuous variables were categorized                                                                                                                                    |
| 14 |                          |     | <b>N.A.</b>                                                                                                                                                                                                  |
| 15 |                          |     |                                                                                                                                                                                                              |
| 16 |                          |     | (c) If relevant, consider translating estimates of relative risk into absolute risk for a meaningful time period                                                                                             |
| 17 |                          |     | <b>YES (p. 8)</b>                                                                                                                                                                                            |
| 18 |                          |     |                                                                                                                                                                                                              |
| 19 | Other analyses           | 17  | Report other analyses done—eg analyses of subgroups and interactions, and sensitivity analyses                                                                                                               |
| 20 |                          |     | <b>N.A.</b>                                                                                                                                                                                                  |
| 21 |                          |     |                                                                                                                                                                                                              |
| 22 | <b>Discussion</b>        |     |                                                                                                                                                                                                              |
| 23 | Key results              | 18  | Summarise key results with reference to study objectives                                                                                                                                                     |
| 24 |                          |     | <b>YES (p. 11)</b>                                                                                                                                                                                           |
| 25 | Limitations              | 19  | Discuss limitations of the study, taking into account sources of potential bias or imprecision. Discuss both direction and magnitude of any potential bias                                                   |
| 26 |                          |     | <b>YES (p. 13-14)</b>                                                                                                                                                                                        |
| 27 |                          |     |                                                                                                                                                                                                              |
| 28 | Interpretation           | 20  | Give a cautious overall interpretation of results considering objectives, limitations, multiplicity of analyses, results from similar studies, and other relevant evidence                                   |
| 29 |                          |     | <b>YES (p.11-15)</b>                                                                                                                                                                                         |
| 30 |                          |     |                                                                                                                                                                                                              |
| 31 | Generalisability         | 21  | Discuss the generalisability (external validity) of the study results                                                                                                                                        |
| 32 |                          |     | <b>YES (p. 13)</b>                                                                                                                                                                                           |
| 33 | <b>Other information</b> |     |                                                                                                                                                                                                              |
| 34 | Funding                  | 22  | Give the source of funding and the role of the funders for the present study and, if applicable, for the original study on which the present article is based                                                |
| 35 |                          |     | <b>YES (p. 15)</b>                                                                                                                                                                                           |
| 36 |                          |     |                                                                                                                                                                                                              |
| 37 |                          |     |                                                                                                                                                                                                              |
| 38 |                          |     |                                                                                                                                                                                                              |

\*Give information separately for exposed and unexposed groups.

**Note:** An Explanation and Elaboration article discusses each checklist item and gives methodological background and published examples of transparent reporting. The STROBE checklist is best used in conjunction with this article (freely available on the Web sites of PLoS Medicine at <http://www.plosmedicine.org/>, Annals of Internal Medicine at <http://www.annals.org/>, and Epidemiology at <http://www.epidem.com/>). Information on the STROBE Initiative is available at [www.strobe-statement.org](http://www.strobe-statement.org).
